# Supplementary material for: Measured and perceived impacts of evidence-based leadership in nursing: a mixed-methods systematic review protocol
Source: PubMed Central journal article supplement — BMJ Open. 2021 Oct 22;11(10):e055356. doi: 10.1136/bmjopen-2021-055356 (PMC8543649; doi:10.1136/bmjopen-2021-055356), 2021-10-22
Supplement: bmjopen-2021-055356.draft_revisions.pdf [file bmjopen-2021-055356.draft_revisions.pdf]

# BMJ Open

BMJ Open is committed to open peer review. As part of this commitment we make the peer review history of every article we publish publicly available.

When an article is published we post the peer reviewers' comments and the authors' responses online. We also post the versions of the paper that were used during peer review. These are the versions that the peer review comments apply to.

The versions of the paper that follow are the versions that were submitted during the peer review process. They are not the versions of record or the final published versions. They should not be cited or distributed as the published version of this manuscript.

BMJ Open is an open access journal and the full, final, typeset and author-corrected version of record of the manuscript is available on our site with no access controls, subscription charges or pay-per-view fees (<http://bmjopen.bmj.com>).

If you have any questions on BMJ Open's open peer review process please email [info.bmjopen@bmj.com](mailto:info.bmjopen@bmj.com)

# BMJ Open

## MEASURED AND PERCEIVED IMPACTS OF EVIDENCE-BASED LEADERSHIP IN NURSING: A MIXED-METHODS SYSTEMATIC REVIEW PROTOCOL

|                               |                                                                                                                                                                                                                                                                                                                                                                                                                                                                                                                                                                                                                                                                    |
|-------------------------------|--------------------------------------------------------------------------------------------------------------------------------------------------------------------------------------------------------------------------------------------------------------------------------------------------------------------------------------------------------------------------------------------------------------------------------------------------------------------------------------------------------------------------------------------------------------------------------------------------------------------------------------------------------------------|
| Journal:                      | <i>BMJ Open</i>                                                                                                                                                                                                                                                                                                                                                                                                                                                                                                                                                                                                                                                    |
| Manuscript ID                 | bmjopen-2021-055356                                                                                                                                                                                                                                                                                                                                                                                                                                                                                                                                                                                                                                                |
| Article Type:                 | Protocol                                                                                                                                                                                                                                                                                                                                                                                                                                                                                                                                                                                                                                                           |
| Date Submitted by the Author: | 09-Jul-2021                                                                                                                                                                                                                                                                                                                                                                                                                                                                                                                                                                                                                                                        |
| Complete List of Authors:     | Välimäki, Maritta; University of Turku, Department of Nursing Science; Central South University, Xiangya Nursing School<br>Lantta, Tella; University of Turku, Department of Nursing Science<br>Hipp, Kirsi; University of Turku Faculty of Medicine, Department of Nursing Science<br>Varpula, Jaakko; University of Turku, Department of Nursing Science<br>Liu, Gaoming; Hunan Cancer Hospital<br>Tang, Yao; Central South University, Xiangya Nursing School<br>Chen, Wenjun; University of Ottawa, School of Nursing<br>Hu, Shuang; Central South University, The Third Xiangya Hospital<br>Li, Xianhong; Central South University, Xiangya School of Nursing |
| Keywords:                     | Organisational development < HEALTH SERVICES ADMINISTRATION & MANAGEMENT, Protocols & guidelines < HEALTH SERVICES ADMINISTRATION & MANAGEMENT, HEALTH SERVICES ADMINISTRATION & MANAGEMENT, Quality in health care < HEALTH SERVICES ADMINISTRATION & MANAGEMENT                                                                                                                                                                                                                                                                                                                                                                                                  |
|                               |                                                                                                                                                                                                                                                                                                                                                                                                                                                                                                                                                                                                                                                                    |

SCHOLARONE™  
Manuscripts

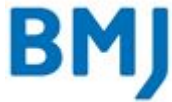

I, the Submitting Author has the right to grant and does grant on behalf of all authors of the Work (as defined in the below author licence), an exclusive licence and/or a non-exclusive licence for contributions from authors who are: i) UK Crown employees; ii) where BMJ has agreed a CC-BY licence shall apply, and/or iii) in accordance with the terms applicable for US Federal Government officers or employees acting as part of their official duties; on a worldwide, perpetual, irrevocable, royalty-free basis to BMJ Publishing Group Ltd ("BMJ") its licensees and where the relevant Journal is co-owned by BMJ to the co-owners of the Journal, to publish the Work in this journal and any other BMJ products and to exploit all rights, as set out in our [licence](#).

The Submitting Author accepts and understands that any supply made under these terms is made by BMJ to the Submitting Author unless you are acting as an employee on behalf of your employer or a postgraduate student of an affiliated institution which is paying any applicable article publishing charge ("APC") for Open Access articles. Where the Submitting Author wishes to make the Work available on an Open Access basis (and intends to pay the relevant APC), the terms of reuse of such Open Access shall be governed by a Creative Commons licence – details of these licences and which [Creative Commons](#) licence will apply to this Work are set out in our licence referred to above.

Other than as permitted in any relevant BMJ Author's Self Archiving Policies, I confirm this Work has not been accepted for publication elsewhere, is not being considered for publication elsewhere and does not duplicate material already published. I confirm all authors consent to publication of this Work and authorise the granting of this licence.

1  
2  
3 **MEASURED AND PERCEIVED IMPACTS OF EVIDENCE-BASED LEADERSHIP IN**  
4 **NURSING: A MIXED-METHODS SYSTEMATIC REVIEW PROTOCOL**  
5  
6  
7

8 VÄLIMÄKI Maritta, University of Turku, Department of Nursing Science, Turku, Finland and  
9 Central South University, Xiangya Nursing School, Changsha, China, mava@utu.fi

11 LANTTA Tella, University of Turku, Department of Nursing Science, Turku, Finland,  
12 tejela@utu.fi

14 HIPPI Kirsi, University of Turku, Department of Nursing Science, Turku, Finland,  
15 kirsi.hipp@utu.fi

17 VARPULA Jaakko, University of Turku, Department of Nursing Science, Turku, Finland,  
18 jaheva@utu.fi

21 LIU Gaoming, Hunan Cancer Hospital, Changsha, China, 354205223@qq.com

23 TANG Yao, Central South University, Xiangya Nursing School, Changsha, China,  
24 1079536059@qq.com

26 CHEN Wenjun, University of Ottawa, Ottawa, Canada, wchen140@uottawa.ca

28 HU Shuang, The Third Xiangya Hospital of Central South University, Changsha, China,  
29 1432306591@qq.com

31 LI Xianhong, Central South University, Xiangya Nursing School, Changsha, China,  
32 xianhong\_li@csu.edu.cn

35  
36 **Corresponding author:**

37 Xianhong Li, RN, PhD, FAAN, Xiangya Nursing School of Central South University

39 Address: 172 Tongzipo Road, Changsha, Hunan, 410013, P.R.China

41 Email: xianhong\_li@csu.edu.cn

43  
44  
45 **Word count: 3559**  
46  
47  
48  
49  
50  
51  
52  
53  
54  
55  
56  
57  
58  
59  
60

## ABSTRACT

**Introduction:** Despite the abundance of existing literature on evidence-based nursing practice, knowledge regarding evidence-based leadership, i.e., leadership supported by an evidence-based approach, is lacking. Our aim is to conduct a mixed-methods systematic review to examine the measured and perceived effects of evidence-based leadership on nurses' and nurse managers' performance, organizational and clinical outcomes.

**Methods and analysis:** We will search the following databases with no year limit: CINAHL (EBSCO), Cochrane Library, Embase (Elsevier), PubMed (MEDLINE), PsycINFO (EBSCO), Scopus (Elsevier) and Web of Science. Grey literature will be researched using Google Scholar, Emerald, Academy of Management (AOM) and the website for the Center for Evidence-Based Management (CEBMa). In addition, we will screen databases for prospectively registered trials and other systematic reviews. Articles using any type of research design will be included as long as the study includes a component of an evidence-based leadership approach. Three reviewers will independently screen all titles, abstracts and full-text articles, and two reviewers will extract the data according to the appropriate checklists. The quality of each study will be appraised using the Mixed Methods Appraisal Tool (MMAT). The Preferred Reporting Items for Systematic Reviews and Meta-Analyses (PRISMA) grid and Meta-Analysis Protocols (PRISMA-P) will guide the study process and reporting. Outcomes related to individual or group performance of nurses or nurse managers regarding leadership skills (e.g., communication skills), organizational outcomes (e.g., work environment, costs), or clinical outcomes (e.g., patient quality of life, treatment satisfaction) will be extracted and synthesized.

**Ethics and dissemination:** This mixed-methods systematic review will not include empirical data, and therefore, ethics approval will not be sought. The results of the review will be published in a peer-reviewed scientific journal. We will thus engage relevant stakeholders within our team to determine the best possible approaches for dissemination.

**Systematic review registration:** PROSPERO CRD42021259624

## STRENGTHS AND LIMITATIONS OF THIS STUDY

- This mixed-methods systematic review is justified by the lack of synthesized knowledge on impacts of evidence-based leadership in nursing, an issue that is needed to answer current challenges in health care.
- A comprehensive literature search using several electronic databases and a manual search will be supplemented by a search of grey literature.
- Including grey literature articles that have not undergone the peer-review process may increase the variation in the methodological quality.
- To ensure transparent and complete reporting, the protocol has been written following the PRISMA-P guidelines.
- To promote the dissemination and the use of evidence produced, the review findings will be validated in collaboration with nursing associations.

## INTRODUCTION

Around 20 million nurses make up nearly half of the global health workforce.[1] WHO has estimated a need to increase this number by 9 million nurses and midwives by the year 2030.[2]

The nursing profession thus has a demanding target to meet to be able to address current and future health needs.[3] From the viewpoint of collective leadership, acts of leadership should come from any nurse rather than only from formal nursing leaders.[4] The American Nurses Association has stated that registered nurses demonstrate leadership in their profession, and this association highlights the importance of strengthening nurses' leadership competences, including competences in leading oneself, leading others and leading the organization.[5] Effective leadership is, after all, one of the contributions of nurses in improving global health.[2]

According to the Royal College of Nursing,[4] the role of leadership is to promote direction, alignment, and commitment among teams and organizations. Vender[6] defines leadership as “a combination of position, responsibilities, attitude, skills, and behaviors that allows someone to bring out the best in others, and the best in their organization, in a sustainable manner”, while Carney[7] defines clinical leadership as “providing health care through a collaborative and ethical process that uses advocacy to effect change for the benefit of patients”. Stanley[8] describes a clinical leader as a “clinician who is an expert in their field, and who, because they are approachable, effective communicators and empowered, are able to act as a role model, motivating others by matching their values and beliefs about nursing and care to their practice”.

Leadership involves showing others the path to be taken.[9] Leadership occurs whenever a person attempts to influence the behavior of individuals or a group based on personal goals or for the goals of others congruent with organizational goals.[10] Those who are effective nurse leaders engage others to work together effectively in pursuit of a shared goal. Leadership is

1  
2  
3 based on influence and shared meaning.[11] Therefore, leading requires the ability to diagnose or  
4 understand a situation to be influenced, the ability to communicate, and the ability to adapt to  
5 behaviors and resources that will help goals be met.[10]  
6  
7

8  
9  
10 In the literature, there are discussions about whether there is a distinction between the concepts  
11 of leadership and management. It has been stated that managers are formally designated and  
12 assigned to their role,[11] while leaders have an informal role achieved based on their own  
13 skills.[8, 11] Management involves getting work done through others based on authority[11] and  
14 is about handling situations through control,[9] while being a nurse leader does not require a  
15 position of authority.[8, 9, 12] On the other hand, management and leadership often go hand in  
16 hand; in modern health care environments, managers are required to be leaders. Therefore, the  
17 distinction between managers and leaders is becoming blurred,[12] and some authors[e.g., 13] do  
18 not distinguish between leading and managing.  
19  
20  
21  
22  
23  
24  
25  
26  
27  
28  
29  
30  
31

32 There is already a large knowledge base in systematic reviews regarding leadership in different  
33 professional health care areas. Reed et al.[14] summarized the results of 44 articles in the field of  
34 pharmacy and found great variation in definitions of leadership. Leaders were said to influence,  
35 motivate, enable and empower others in relation to a specific goal or change. The review found  
36 that a conceptualization of leadership competences was often lacking. Berghout et al.[15]  
37 reviewed 34 articles about medical leadership conceptualized by physicians. Several skills and  
38 competences emerged, such as skills related to communication and empowering, conflict  
39 resolving, and clinical knowledge. On the contrary, a review of leadership among dentists found  
40 that the literature mirrors generic leadership theories for health care, and that knowledge  
41 supporting leadership specifically in dental practice is still lacking.[16] Further, Reichenpader et  
42 al.[17] focused on leadership in evidence-based practice. Out of 17 studies included, 11 studies  
43  
44  
45  
46  
47  
48  
49  
50  
51  
52  
53  
54  
55  
56  
57  
58  
59  
60

1  
2  
3 referred to nursing. The review found definitional imprecision and conceptual inconsistency over  
4  
5 the concept of leadership: it was understood to be a modifier of implementation effectiveness or  
6  
7 use of research evidence, where leaders' positive influences and direct or indirect facilitative  
8  
9 behaviors on implementation success were emphasized.  
10

11  
12  
13 There are numerous publications on the topic of leadership in the field of nursing. We found  
14  
15 another 28 systematic reviews related to the concept of nursing leadership. The reviews focused  
16  
17 on skills and competences required of nurse leaders.[18–22] Leadership has been described to  
18  
19 have an impact on nurses' job satisfaction,[23–25] motivation, ability to perform their job,[26]  
20  
21 use of research evidence,[27] and intention to stay in their job.[23–24, 28] Reviews have also  
22  
23 reported how leadership has impacted organizational outcomes, such as work culture and  
24  
25 climate,[23, 29] work environment[30] and costs.[23] Further, several clinical outcomes have  
26  
27 been studied: quality of care including pain, restraint use, medication errors,[31] patient  
28  
29 safety,[32] patient satisfaction, and adverse events.[23, 33–34]  
30  
31  
32

33  
34 Reviews have focused on how leadership skills are supported, and examples include  
35  
36 administrative clinical supervision[35] and training.[36] Cummings et al. found that leadership  
37  
38 can be promoted by educational activities, although evidence is limited due to weaknesses in  
39  
40 study designs.[37] In their recent review, Cummings et al. identified that high-quality evidence is  
41  
42 lacking in relation to specific nurse characteristics and organizational factors that most  
43  
44 effectively contribute to educational interventions.[38] Husebø and Akerjordet reviewed  
45  
46 quantitative studies to examine the impact of multi-professional teamwork and leadership  
47  
48 training interventions on patient outcomes.[39] Again, due to research designs used, no  
49  
50 recommendations could be made to nursing practice.  
51  
52  
53  
54  
55  
56  
57  
58  
59  
60



1  
2  
3 More recently, literature has described the concept of evidence-based management (EBMgt),  
4 which incorporates the best available scientific evidence in making managerial decisions. Four  
5 essential elements are crucial in practicing EBMgt: external scientific evidence; practitioner's  
6 experience and judgment; stakeholders' preferences or values; and different contexts and  
7 organizational factors.[40–41] We found five systematic reviews focusing on evidence-based  
8 management (EBMgt) in health care. Hasanpoor et al.[42] conducted a meta-synthesis based on  
9 qualitative studies (n=23) among health care managers. The meta-synthesis identified facilitators,  
10 barriers, sources of evidence used, and the process of decision making in EBMgt. Barriers in  
11 implementing EBMgt included a lack of time or limited access to evidence despite positive  
12 attitudes towards EBMgt among managers. Roshanghalb et al.[43] summarized 20 empirical  
13 studies and 10 previous reviews, and concluded that the main sources of evidence are published  
14 studies, real world evidence and experts' opinions. EBMgt was used to make staff performance  
15 assessments, change management, transfer organizational knowledge and do strategic planning.  
16 Another literature review by Young[44] reported that, although EBMgt was emphasized, it was  
17 used limitedly due to a lack of research on management activities, policy constraints, and a lack  
18 of time. Factors promoting the use of EBMgt included research culture, personal beliefs, good  
19 work organization and sufficient self-discipline. Jaana et al.[45] reviewed systematic reviews and  
20 meta-analyses to explore if research evidence is available for health care managers. They found  
21 that most of the 75 reviews included addressed clinical topics, and they rarely provided evidence  
22 of management-related interventions.

23  
24  
25  
26  
27  
28  
29  
30  
31  
32  
33  
34  
35  
36  
37  
38  
39  
40  
41  
42  
43  
44  
45  
46  
47  
48  
49  
50 Despite of the wide base of existing knowledge, reviews regarding evidence-based leadership,  
51 i.e., leadership supported by an evidence-based approach, are rare. Evidence-based leadership  
52 was used as a concept in one previous systematic literature review. Geerts et al.[46] focused on  
53  
54  
55  
56  
57  
58  
59  
60

1  
2  
3 evidence-based leadership development for physicians. The review found that improvements  
4 could be achieved at the individual and organizational level and for the benefit of patients.  
5  
6 Especially effective interventions for the development of leadership included, for instance,  
7  
8 interactive workshops, video-recorded simulations, coaching, and mentoring.[46] To answer to  
9  
10 the call to promote leadership in nursing,[1] we postulate that evidence-based approaches should  
11  
12 be used in supporting nursing leadership because insufficient evidence-based decision making  
13  
14 and management have been identified in nursing, and leaders do not always understand how  
15  
16 evidence could be translated into practice.[47] Another reported reason is a lack of research on  
17  
18 evidence-based management and leadership that is specific to the nursing field.[48] Currently,  
19  
20 leaders do not have sufficient skills for refined problem-solving and making decisions based on  
21  
22 data,[49] and leadership decisions are mostly based on experience and intuition[50–51] or the  
23  
24 personal views of other leaders.[48] It is therefore time to rethink how an evidence-based  
25  
26 approach could be used by nurse leaders in their decision making. Thus, in this review we will  
27  
28 synthesize the existing knowledge on how and why evidence is used to solve leadership  
29  
30 problems and to support leadership in daily nursing practice.  
31  
32  
33  
34  
35  
36  
37

## 38 **METHODS AND ANALYSIS**

### 39 **Aim and research questions**

40  
41 The overall aim of this mixed-methods systematic review is to examine the evidence of the  
42  
43 measured and perceived effects of evidence-based leadership on nurses and nurse managers'  
44  
45 performance, organizational and clinical outcomes. The review questions are as follows: (1)  
46  
47 What leadership problems are solved using an evidence-based approach? (2) What are the main  
48  
49 features in evidence-based leadership? (3) What are the perceived effects of evidence-based  
50  
51 leadership on nurses' performance, organizational and clinical outcomes? (4) What are the  
52  
53  
54  
55  
56  
57  
58  
59  
60

1  
2  
3 measured effects of evidence-based leadership on nurses' performance, organizational and  
4  
5 clinical outcomes?  
6  
7

## 8 **Design**

9  
10 In this review, we will use a mixed-methods approach by combining narrative and quantitative  
11  
12 synthesis to search, appraise and synthesize empirical evidence. The approach is usable to our  
13  
14 review as it provides the potential for gaining a more complete picture and holistic understanding  
15  
16 of the topic. Further, this approach is useful for our purpose as our narrative synthesis focuses on  
17  
18 a wide range of questions, not only those relating to the effectiveness of a particular  
19  
20 intervention.[52]  
21  
22  
23

24  
25 To ensure transparent and complete reporting, this review protocol is designed in accordance  
26  
27 with the Preferred Reporting Items for Systematic Reviews and Meta-Analyses (PRISMA) grid  
28  
29 and Meta-Analysis Protocols (PRISMA-P). The review protocol has been registered with  
30  
31 CRD42021259624 in PROSPERO (International Prospective Register of Systematic Reviews).  
32  
33  
34

## 35 **Eligibility criteria**

### 36 **Study design**

37  
38 Articles using any type of research design will be included as long as the study includes a topic  
39  
40 of leadership and any component of an evidence-based leadership approach.  
41  
42  
43  
44

### 45 **The PICO**

46  
47  
48 The PICO (population, intervention, comparison, outcome) approach will be used to specify the  
49  
50 eligibility of studies.  
51  
52

53  
54 *Population (P)*: Articles should include nurses, nurse managers or other nursing staff working in  
55  
56 a health care context. They can have an official or unofficial managerial role.[53] Articles  
57  
58  
59

1  
2  
3 involving other health care professionals will be excluded if nurses are not clear majority (50%  
4 or more) in the sample.  
5  
6

7  
8 *Intervention (I)*: Leadership refers to the process of when a person attempts to influence the  
9 behavior of individuals or a group in an organization for any reason[53], while an evidence-  
10 based leadership occurs when the behavior of individuals or a group is affected using an  
11 evidence-based approach. We propose that evidence-based leadership is analogous to evidence-  
12 based management,[40–41] but the role or position of the leader may not always be assigned or  
13 officially approved of by the organization.  
14  
15

16  
17 We assume that evidence-based leadership is a process that includes the following steps: 1) a  
18 practitioner identifies a clearly stated leadership problem, question, or issue in their practice, 2)  
19 organizational evidence or data about the leadership problem or issue are collected and analyzed  
20 to check for relevance and validity, and the problem is restated, reformulated or made more  
21 specific, 3) scientific evidence from published research about the leadership problem is  
22 researched, identified and critically appraised, 4) the views of stakeholders (patients, clinicians,  
23 family members, for example) are considered, together with ethical implications of the decision,  
24 and 5) all sources of information are critically appraised.[54] The articles to be included in this  
25 review should identify some or all of the five steps of the EBP process.[55–56]  
26  
27  
28  
29  
30  
31  
32  
33  
34  
35  
36  
37  
38  
39  
40  
41  
42  
43

44 *Comparison (C)*: If an included study has used a randomized trial design, we will include  
45 another type of intervention as a comparison.  
46  
47  
48

#### 49 *Outcomes*

50  
51 Studies will describe any outcomes related to individual or group performance of nurses or nurse  
52 managers regarding leadership skills (e.g., communication skills), organizational outcomes (e.g.,  
53  
54  
55  
56  
57  
58  
59  
60

1  
2  
3 work environment, costs), health care provider outcomes (e.g., job satisfaction), or clinical  
4  
5 outcomes (e.g., patient quality of life, treatment satisfaction).  
6  
7

### 8 *Other*

9  
10  
11 Articles will be limited to peer-reviewed, published full-text articles. There will be no language  
12  
13 restriction. Theoretical papers, statistical reviews, books and book chapters, letters, dissertations,  
14  
15 editorials, and study protocols will be excluded.  
16  
17

### 18 **Data sources**

19  
20  
21 A comprehensive literature search, with no specific year limits, will be conducted. The following  
22  
23 electronic databases will be used: CINAHL (EBSCO), Cochrane Library (academic database for  
24  
25 medicine and health science and nursing), Embase (Elsevier), PubMed (MEDLINE), PsycINFO  
26  
27 (EBSCO), Scopus (Elsevier), and Web of Science (academic database across all scientific and  
28  
29 technical disciplines, ranging from medicine and social sciences to arts and humanities). These  
30  
31 databases will allow for a wide literature search within our review topic. The reference lists of  
32  
33 the selected papers will also be screened for additional studies. In addition, grey literature will be  
34  
35 researched using Google Scholar, Emerald, Academy of Management (AOM) and the website  
36  
37 for the Center for Evidence-Based Management (CEBMA).  
38  
39  
40  
41  
42

### 43 **Search strategy**

44  
45  
46 The search strategy will be elaborated upon and implemented prior to the study selection. We  
47  
48 will use the PRISMA-P checklist for guidance. A controlled vocabulary thesaurus (such as  
49  
50 medical subject heading terms, CINAHL headings, PsycINFO thesaurus) and their keywords  
51  
52 will be verified for each database. The search terms will be combined using the Boolean  
53  
54 operators “AND” and “OR.” Advice on using keywords to search for studies will be sought from  
55  
56  
57  
58  
59  
60

a faculty librarian. An example of the PubMed database and the search terms used is presented in Table 1.

**Table 1.** Example of the PubMed database and search terms used (10 May 2021).

| Database | Search terms                                                                                                                                                                                                                                                                                                                                                                                                                                                                                                                                                                                                                                                                                                                                                                                                                                                                                                                                                                                                                                                                                                                                                                                 | Number of hits |
|----------|----------------------------------------------------------------------------------------------------------------------------------------------------------------------------------------------------------------------------------------------------------------------------------------------------------------------------------------------------------------------------------------------------------------------------------------------------------------------------------------------------------------------------------------------------------------------------------------------------------------------------------------------------------------------------------------------------------------------------------------------------------------------------------------------------------------------------------------------------------------------------------------------------------------------------------------------------------------------------------------------------------------------------------------------------------------------------------------------------------------------------------------------------------------------------------------------|----------------|
| PubMed   | ("nursing leadership*[tw] OR "leadership in nursing*[tw] OR "nurse leader*[tw] OR "nurse manag*[tw] OR "nursing manag*[tw] OR "nursing supervisor*[tw] OR "nurse supervisor*[tw] OR "Nursing, Supervisory"[Mesh] OR "director of nursing*[tw] OR "nursing director*[tw] OR "nurse director*[tw] OR "nurse administrator*[tw] OR "Nurse Administrators"[Mesh] OR "nursing administrator*[tw] OR "nurse executive*[tw] OR "executive nurse*[tw] OR "primary nurse*[tw] OR "chief nurse*[tw] OR "chief nursing officer*[tw] OR "head nurse*[tw] OR "matron*[tw] OR "charge nurse*[tw] OR "sister nurse*[tw] OR "ward sister*[tw] OR "nurse executive*[tw] OR "nursing executive*[tw]) AND ("evidence based leadership*[tw] OR EBL[tw] OR "evidence based management*[tw] OR EBM[tw] OR "evidence based practice*[tw] OR "Evidence-Based Practice"[Mesh] OR EBP[tw] OR "evidence based nursing*[tw] OR "Evidence-Based nursing"[Mesh] OR EBN[tw] OR "evidence based health*[tw]) AND (leadership*[tw] OR lead*[tw] OR "Leadership"[Mesh] OR manag*[tw] OR organiz*[tw] OR "Organization and Administration"[Mesh] OR influenc*[tw] OR "Peer Influence"[Mesh] OR administrat*[tw] OR superv*[tw]) | 882            |

### Data management

EndNote or some other type of reference manager will be used to efficiently manage records, document the process, and manage duplicate study papers.

### Selection process

The study selection process will consist of four steps (Figure 1). First, titles and abstracts will be independently assessed by three authors (MV, KH, TL) according to the inclusion criteria.

Second, the abstracts of the papers will be screened for relevance and eligibility, by the same

three authors (MV, KH, TL). Third, the full texts of the selected articles will be screened by three authors (MV, KH, XL) according to the inclusion and exclusion criteria. In cases of discrepancy between the three screening authors, the paper will be discussed with another author (TL). Papers that do not meet the inclusion criteria will be rejected, and the reason for exclusion will be recorded to increase transparency in the selection process. Fourth, the full texts of the studies that meet the inclusion criteria will be obtained for further detailed assessment. The reference lists of the selected papers will also be screened and checked for additional papers that meet the inclusion criteria (JV, GL).

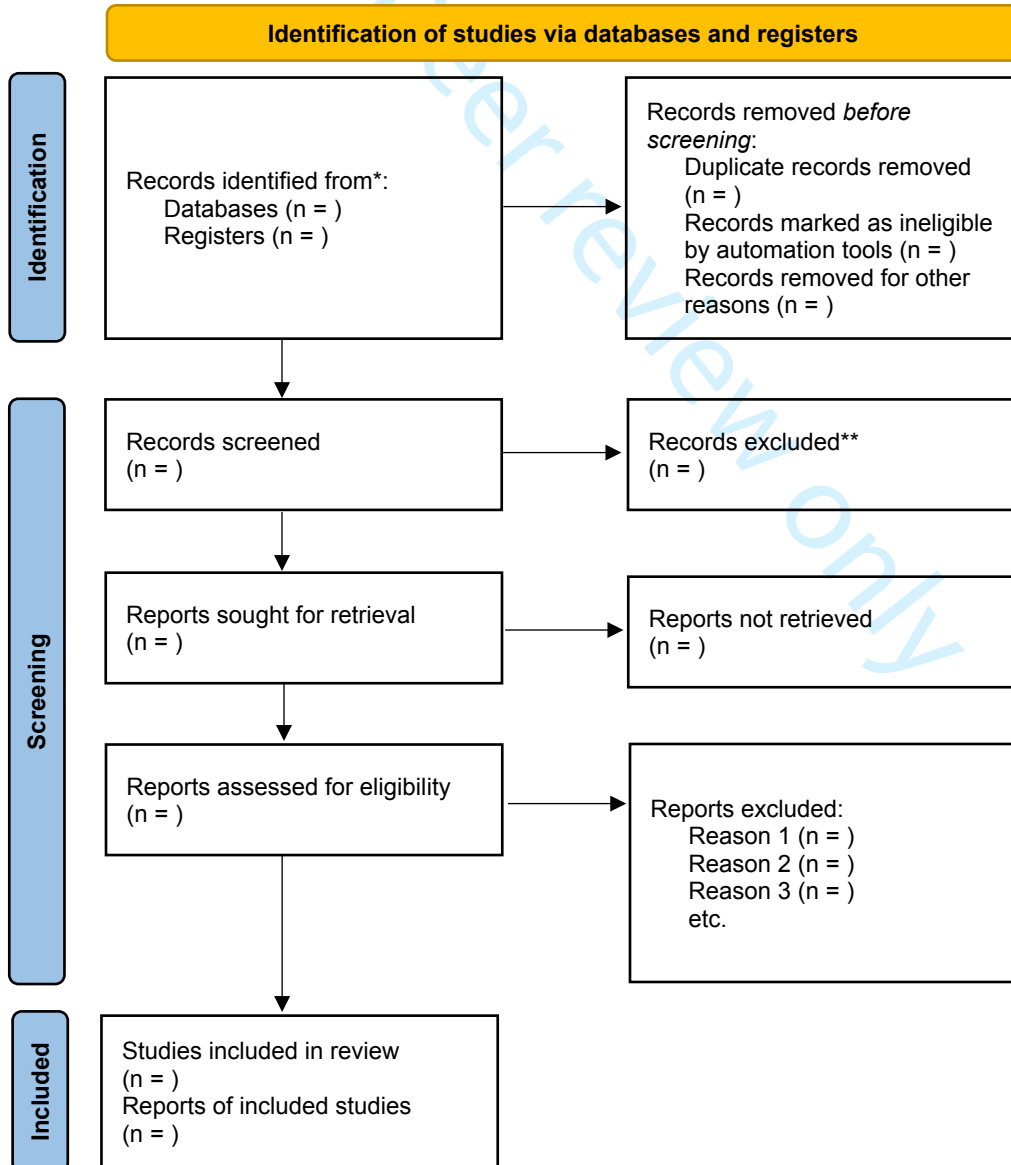

1  
2  
3  
4  
5  
6  
7  
8 **Figure 1.** PRISMA flow chart.[57]  
9

### 10 **Data collection and extraction process**

11  
12  
13 To answer the review questions, specific tables will be created to collect data from selected  
14 papers. The effectiveness data will be extracted by three authors (TL, MV, WC) and will be  
15 reviewed for completeness and accuracy by another author (XL).  
16  
17

18  
19  
20  
21 Three data extraction forms will be used for the experimental and qualitative studies included in  
22 the review. The selected papers will be extracted by three authors (YT, SH, WC), and inputted  
23 into predesigned tables; the process will be validated (MV).  
24  
25  
26

27  
28  
29 Quantitative data will be extracted from papers included in the review using the standardized  
30 data extraction tool from JBI-MAStARI.[58] The data extracted will include specific details  
31 about the populations, study methods and outcomes significant to the review question and the  
32 specific objectives.  
33  
34  
35

36  
37  
38 Qualitative data will be extracted from papers included in the review using the standardized data  
39 extraction tool from JBI-QARI.[58] The data extracted will include specific details about the  
40 populations, study methods and outcomes significant to the review question and the specific  
41 objectives.  
42  
43  
44

45  
46  
47  
48 If available, economic data will be extracted from papers included in the review using the  
49 standardized data extraction tool from JBI-ACTUARI.[56] The data extracted will include  
50 specific details about the populations, study methods and outcomes significant to the review  
51 question and the specific objectives.  
52  
53  
54  
55  
56  
57  
58  
59  
60



1  
2  
3 In addition, details of the evidence-based leadership interventions will be extracted following the  
4 TIDieR checklist:[59] brief name; why the intervention is essential; materials and procedures;  
5  
6 providers and their expertise; models of delivery; location and infrastructure; sessions; tailoring;  
7  
8 modifications; planned and actual adherence or fidelity. The data will be extracted by two  
9  
10 authors (JV, KH).  
11  
12  
13

### 14 15 **Risk of bias in individual studies** 16

17  
18 During the review process, studies will be deemed to have risk of bias if they fail to make  
19  
20 objective decisions on study design and on the level of quality required.[60]  
21  
22

23 The quality of each study will be appraised using the Mixed Methods Appraisal Tool (MMAT).  
24

25 The tool is usable as a checklist for concomitantly appraising and/or describing studies included  
26  
27 in systematic mixed studies reviews (reviews including original qualitative, quantitative and  
28  
29 mixed methods studies). The quantitative studies will be assessed according to their respective  
30  
31 characteristics, including the sampling strategy, the measuring instruments, and the response  
32  
33 rate. For qualitative studies, the assessment criteria will include context, data sources, and data  
34  
35 analysis. The evaluation criteria for the mixed-methods studies will include the integration of the  
36  
37 methods and the limitations presented. Three reviewers (YT, SH, XL), for each of the criteria,  
38  
39 will independently assign a score based on “yes,” “no,” “unspecified,” or “not applicable”  
40  
41 responses. Any disagreement between the reviewers will be resolved by discussion or by  
42  
43 requesting the assessment of a fourth reviewer (XL).  
44  
45  
46  
47  
48

49 The Cochrane Collaboration’s tool for assessing risk of bias in randomized trials will also be  
50  
51 used to assess the quality of randomized trial articles included in the review.[61] Each area to be  
52  
53  
54  
55  
56  
57  
58  
59  
60

1  
2  
3 assessed will be rated as “low risk,” “high risk” or “unclear risk” of bias. The overall quality of  
4 an article using a randomized controlled trial design will be rated as “good,” “fair” or “poor.”  
5  
6  
7

### 8 **Data synthesis**

9  
10  
11 Initial descriptive synthesis will be conducted by tabulating details on study type, interventions,  
12 number of participants and an overview of participant characteristics, to form a clear descriptive  
13 summary of the included studies.[62] The descriptive process will be conducted explicitly and  
14 rigorously, and decisions on how to group and tabulate data will be made based on the protocol  
15 and review questions. The Grading of Recommendations Assessment, Development and  
16 Evaluation (GRADE) will be used to evaluate the quality of evidence.[63]  
17  
18  
19  
20  
21  
22  
23  
24  
25

### 26 **Patient and public involvement**

27  
28 Patients will not be directly involved in the design of this study. As this is a protocol for a  
29 systematic review and no participant recruitment will take place, their involvement in the  
30 recruitment as well as the dissemination of findings to participants will not be applicable.  
31  
32 However, the results of the review will be validated in close collaboration with national and  
33 international nursing associations. This will ensure that the findings are presented in a way that is  
34 easy-to-use and feasible for leadership communities globally.  
35  
36  
37  
38  
39  
40  
41  
42

### 43 **DISCUSSION**

44  
45  
46 In the course of a decade, the call for evidence has swept the health care landscape in medicine  
47 and more recently in nursing. However, health care managers and leaders have somehow  
48 escaped the call for the use of evidence in their own practice. The time has come for  
49 organizational leaders to join clinicians in using the strongest evidence available to effect change  
50 and guide decision making.[64] To answer the call, this mixed-methods review will provide  
51  
52  
53  
54  
55  
56  
57  
58  
59  
60

1  
2  
3 greater insights into the available literature on evidence-based leadership in nursing. Based on  
4 both quantitative and qualitative findings, we will summarize and synthesize the available results  
5 regarding the impact of the evidence-based leadership on nurses' and nurse managers' individual  
6 and team-based leadership skills, as well as organizational and clinical outcomes. We expect to  
7 gain evidence that will benefit nursing leaders in health care organizations worldwide.  
8  
9

10  
11  
12 In general, leadership and management training programs have not only positively impacted  
13 individuals' leadership skills, but also patient safety, satisfaction, and cost savings in  
14 organizations.[65] Good leadership in health organizations also has the potential to positively  
15 impact employees' well-being, for example, an increase in work engagement and a decrease in  
16 exhaustion and turnover intention.[66] This is highly important as the existing nursing shortage,  
17 the ageing of the nursing workforce, and the COVID-19 pandemic has created an alarming  
18 situation in health care settings globally. The International Council of Nurses has already  
19 estimated that up to 13 million nurses will be needed to fill the global nurse shortage gap in the  
20 near future.[67] Strong evidence-based leadership in nursing is therefore needed more than ever  
21 before. To attract new generations of nurses to the health care business, and to cost-effectively  
22 run health care organizations, nursing leaders who based their leadership decisions on the best  
23 available evidence are needed. Thus, a review of evidence-based leadership among nurses is  
24 required to direct research and education efforts toward more effective leadership styles and  
25 inform service provisions of the best investment methods for the future nursing workforce.  
26  
27  
28

29  
30  
31 A limitation of this review may be the exclusion of studies that are not peer-reviewed or included  
32 in the major international databases, which could potentially result in less generalizable findings  
33 outside of the English language. We also predict that it is not possible to conduct a meta-analysis  
34 to reveal the effectiveness of evidence-based leadership due to a lack of studies or high  
35  
36  
37  
38  
39  
40  
41  
42  
43  
44  
45  
46  
47  
48  
49  
50  
51  
52  
53  
54  
55  
56  
57  
58  
59  
60

1  
2  
3 heterogeneity of the data. Despite the possible limited number of RCT studies from which to  
4  
5 pool quantitative evidence, we still assume that using descriptive synthesis will provide good  
6  
7 groundwork for the topic to be used to satisfy future needs in the nursing workforce.  
8  
9

### 10 **Amendments**

11 Any amendments to this protocol will be documented.  
12  
13  
14

### 15 **Planned start and end date**

16 The review is planned to start on 1 September 2021 and end on 28 February 2022.  
17  
18  
19

### 20 **ETHICS AND DISSEMINATION**

21  
22 No data collection for the systematic review will involve human subjects, and therefore no  
23  
24 ethical approval will be required. The results will be disseminated in a peer-reviewed journal and  
25  
26 in a conference presentation.  
27  
28  
29

### 30 **REFERENCES**

- 31 1. The Lancet. 2020: unleashing the full potential of nursing. *Lancet* 2019;394:1879.
- 32 2. World Health Organization. Nursing and midwifery, 2020. Available:  
33  
34 <https://www.who.int/news-room/fact-sheets/detail/nursing-and-midwifery> [Accessed 15  
35  
36 Apr 2021].  
37  
38
- 39 3. National Academy of Medicine. The future of nursing 2020-2030: Charting a path to  
40  
41 achieve health equity: a consensus study from the National Academy of Medicine, 2021.  
42  
43 Available: <https://nam.edu/publications/the-future-of-nursing-2020-2030/> [Accessed 15  
44  
45 Apr 2021].  
46  
47
- 48 4. Royal College of Nursing. Leadership, 2021. Available: [https://www.rcn.org.uk/clinical-  
49  
50 topics/clinical-governance/leadership](https://www.rcn.org.uk/clinical-topics/clinical-governance/leadership) [Accessed 15 Apr 2021].  
51  
52  
53  
54  
55  
56  
57  
58  
59  
60

- 1  
2  
3 5. American Nurses Association. ANA Leadership Competency Model, 2018. Available:  
4 [For peer review only - <http://bmjopen.bmj.com/site/about/guidelines.xhtml>](https://www.nursingworld.org/~4a0a2e/globalassets/docs/ce/177626-ana-leadership-<br/>5 <u>booklet-new-final.pdf</u> [Accessed 15 Apr 2021].<br/>6<br/>7</li><li>8<br/>9<br/>10 6. Vender RJ. Leadership: an overview. <i>Am J Gastroenterol</i> 2015;110:362–7.<br/>11<br/>12</li><li>13 7. Carney M. Public health nurses perception of clinical leadership in Ireland: narrative<br/>14 descriptions. <i>J Nurs Manag</i> 2009;17:435–45.<br/>15<br/>16</li><li>17 8. Stanley D. Recognizing and defining clinical nurse leaders. <i>Br J Nurs</i> 2006;15:108–11.<br/>18<br/>19</li><li>20 9. Scully NJ. Leadership in nursing: the importance of recognising inherent values and<br/>21 attributes to secure a positive future for the profession. <i>Collegian</i> 2015;22:439–44.<br/>22<br/>23<br/>24<br/>25</li><li>26 10. Hersey P, Campbell R. Leadership: A Behavioral Science Approach. CA: Leadership<br/>27 Studies Publishing 2004.<br/>28<br/>29</li><li>30 11. Whitehead D, Weiss S, Tappen, R. Essentials of Nursing Leadership and Management.<br/>31 5th ed. Philadelphia: F.A. Davis 2010.<br/>32<br/>33<br/>34</li><li>35 12. Grossman S, Valiga T. The New Leadership Challenge: Creating the Future of Nursing.<br/>36 6th ed. Philadelphia: F.A. Davis 2020.<br/>37<br/>38<br/>39</li><li>40 13. Azad N, Anderson HG Jr, Brooks A, et al. Leadership and management are one and the<br/>41 same. <i>Am J Pharm Educ</i> 2017;81:102.<br/>42<br/>43<br/>44</li><li>45 14. Reed BN, Klutts AM, Mattingly TJ 2nd. A systematic review of leadership definitions,<br/>46 competencies, and assessment methods in pharmacy education. <i>Am J Pharm Educ</i><br/>47 2019;83:7520.<br/>48<br/>49<br/>50<br/>51<br/>52<br/>53<br/>54<br/>55<br/>56<br/>57<br/>58<br/>59<br/>60</li></ol></div><div data-bbox=)

- 1  
2  
3 15. Berghout MA, Fabbriotti IN, Buljac-Samardžić M, et al. Medical leaders or masters? A  
4  
5 systematic review of medical leadership in hospital settings. *PLoS One*  
6  
7 2017;12:e0184522.  
8  
9
- 10 16. Hanks S, Cotton D, Spowart L. Leadership in dental practice: a three stage systematic  
11  
12 review and narrative synthesis. *J Dent* 2020;102:103480.  
13
- 14 17. Reichenpfader U, Carljford S, Nilsen P. Leadership in evidence-based practice: a  
15  
16 systematic review. *Leadersh Health Serv* 2015;28:298–316.  
17  
18
- 19 18. AL-Dossary R, Kitsantas P, Maddox PJ. The impact of residency programs on new nurse  
20  
21 graduates' clinical decision-making and leadership skills: a systematic review. *Nurse*  
22  
23 *Educ Today* 2014;34:1024-8.  
24  
25
- 26 19. Chappell KB, Richards KC. New graduate nurses, new graduate nurse transition  
27  
28 programs, and clinical leadership skill: a systematic review. *J Nurses Prof Dev*  
29  
30 2015;31:128–37.  
31  
32
- 33 20. Claesson M, Jonasson LL, Lindberg E, et al. What implies registered nurses' leadership  
34  
35 close to older adults in municipal home health care? A systematic review. *BMC Nurs*  
36  
37 2020;19:30.  
38  
39
- 40 21. Holm AL, Severinsson E. Effective nursing leadership of older persons in the  
41  
42 community: a systematic review. *J Nurs Manag* 2014;22:211–24.  
43  
44
- 45 22. Pihlainen V, Kivinen T, Lammintakanen J. Management and leadership competence in  
46  
47 hospitals: a systematic literature review. *Leadersh Health Serv* 2016;29:95–110.  
48  
49
- 50 23. Jeon YH, Merlyn T, Chenoweth L. Leadership and management in the aged care sector: a  
51  
52 narrative synthesis. *Australas J Ageing* 2010;29:54–60.  
53  
54  
55  
56  
57  
58  
59  
60

- 1  
2  
3 24. Cummings GG, Tate K, Lee S, et al. Leadership styles and outcome patterns for the  
4  
5 nursing workforce and work environment: a systematic review. *Int J Nurs Stud*  
6  
7 2018;85:19–60.  
8  
9  
10  
11 25. McCay R, Lyles AA, Larkey L. Nurse leadership style, nurse satisfaction, and patient  
12  
13 satisfaction: a systematic review. *J Nurs Care Qual* 2018;33:361–7.  
14  
15  
16 26. Brady Germain P, Cummings GG. The influence of nursing leadership on nurse  
17  
18 performance: a systematic literature review. *J Nurs Manag* 2010;18:425–39.  
19  
20  
21 27. Gifford WA, Squires JE, Angus DE, et al. Managerial leadership for research use in  
22  
23 nursing and allied health care professions: a systematic review. *Implement Sci*  
24  
25 2018;13:127.  
26  
27  
28 28. Cowden T, Cummings G, Profetto-McGrath J. Leadership practices and staff nurses'  
29  
30 intent to stay: a systematic review. *J Nurs Manag* 2011;19:461–77.  
31  
32  
33  
34 29. Cummings GG, Tate K, Lee S, et al. Leadership styles and outcome patterns for the  
35  
36 nursing workforce and work environment: a systematic review. *Int J Nurs Stud*  
37  
38 2018;85:19–60.  
39  
40  
41  
42 30. Pearson A, Laschinger H, Porritt K, et al. Comprehensive systematic review of evidence  
43  
44 on developing and sustaining nursing leadership that fosters a healthy work environment  
45  
46 in healthcare. *JBI Libr Syst Rev* 2007;5:1–65.  
47  
48  
49  
50 31. Sfantou DF, Laliotis A, Patelarou AE, et al. Importance of leadership style towards  
51  
52 quality of care measures in healthcare settings: a systematic review. *Healthcare*  
53  
54 2017;5:73.  
55  
56  
57  
58  
59  
60

- 1  
2  
3 32. Richardson A, Storr J. Patient safety: a literature [corrected] review on the impact of  
4 nursing empowerment, leadership and collaboration. *Int Nurs Rev* 2010;57:12–21.  
5  
6  
7  
8  
9 33. Wong CA, Cummings GG. The relationship between nursing leadership and patient  
10 outcomes: a systematic review. *J Nurs Manag* 2007;15:508–21.  
11  
12  
13  
14 34. Wong CA, Cummings GG, Ducharme L. The relationship between nursing leadership  
15 and patient outcomes: a systematic review update. *J Nurs Manag* 2013;21:709–24.  
16  
17  
18  
19 35. Sirola-Karvinen P, Hyrkäs K. Clinical supervision for nurses in administrative and  
20 leadership positions: a systematic literature review of the studies focusing on  
21 administrative clinical supervision. *J Nurs Manag* 2006;14:601–9.  
22  
23  
24  
25  
26  
27 36. Moore Simas TA, Cain JM, Milner RJ, et al. A systematic review of development  
28 programs designed to address leadership in academic health center faculty. *J Contin Educ*  
29 *Health Prof* 2019;39:42–8.  
30  
31  
32  
33  
34  
35 37. Cummings G, Lee H, Macgregor T, et al. Factors contributing to nursing leadership: a  
36 systematic review. *J Health Serv Res Policy* 2008;13:240–8.  
37  
38  
39  
40  
41 38. Cummings GG, Lee S, Tate K, et al. The essentials of nursing leadership: a systematic  
42 review of factors and educational interventions influencing nursing leadership. *Int J Nurs*  
43 *Stud* 2021;115:103842.  
44  
45  
46  
47 39. Husebø SE, Akerjordet K. Quantitative systematic review of multi-professional  
48 teamwork and leadership training to optimize patient outcomes in acute hospital settings.  
49  
50  
51  
52  
53  
54  
55  
56  
57  
58  
59  
60



- 1  
2  
3 40. Briner RB, Denyer D, Rousseau DM. Evidence-based management: concept cleanup  
4  
5 time? *The Academy of Management Perspectives* 2009;23:19–32.  
6  
7  
8 41. Goodman JS, Gary MS, Wood RE. Bibliographic search training for evidence-based  
9  
10 management education: a review of relevant literatures. *Academy of Management*  
11  
12 *Learning & Education* 2014;13:322–53.  
13  
14  
15 42. Hasanpoor E, Hajebrahimi S, Janati A, et al. Barriers, facilitators, process and sources of  
16  
17 evidence for evidence-based management among health care managers: a qualitative  
18  
19 systematic review. *Ethiop J Health Sci* 2018;28:665–80.  
20  
21  
22 43. Roshanghalb A, Lettieri E, Aloini D, et al. What evidence on evidence-based  
23  
24 management in healthcare? *Management Decision* 2018;56:2069–84.  
25  
26  
27 44. Young SK. Evidence-based management: a literature review. *J Nurs Manag*  
28  
29 2002;10:145–51.  
30  
31  
32 45. Jaana M, Vartak S, Ward MM. Evidence-based health care management: what is the  
33  
34 research evidence available for health care managers? *Eval Health Prof* 2014;37:314–34.  
35  
36  
37  
38 46. Geerts JM, Goodall AH, Agius S. Evidence-based leadership development for  
39  
40 physicians: a systematic literature review. *Soc Sci Med* 2020;246:112709.  
41  
42  
43 47. Kyratsis Y, Ahmad R, Hatzaras K, et al. Making Sense of Evidence in Management  
44  
45 Decisions: The Role of Research-Based Knowledge on Innovation Adoption and  
46  
47 Implementation in Health Care. Southampton: NIHR Journals Library 2014.  
48  
49  
50 48. Shingler-Nace A, Gonzalez JZ. EBM: A pathway to evidence-based nursing  
51  
52 management. *Nursing* 2017;47:43–6.  
53  
54  
55  
56  
57  
58  
59  
60

- 1  
2  
3 49. Miltner RS, Jukkala A, Dawson MA, et al. Professional development needs of nurse  
4  
5 managers. *J Contin Educ Nurs* 2015;46:252–8.  
6  
7  
8  
9 50. Dever KH. Through the eyes of nurse managers in long-term care: identifying perceived  
10  
11 competencies and skills. *J Gerontol Nurs* 2018;44:32–8.  
12  
13  
14 51. Effken JA, Verran JA, Logue MD, et al. Nurse managers' decisions: fast and favoring  
15  
16 remediation. *J Nurs Adm* 2010;40:188–95.  
17  
18  
19 52. Grant MJ, Booth A. A typology of reviews: an analysis of 14 review types and associated  
20  
21 methodologies. *Health Info Libr J* 2009;26:91–108.  
22  
23  
24 53. Hersey P, Campbell R. Leadership: A Behavioral Science Approach. CA: Leadership  
25  
26 Studies Publishing 2004.  
27  
28  
29 54. Barends E, Rousseau DM, Briner RB. Evidence-Based Management: The Basic  
30  
31 Principles. The Center for Evidence-Based Management, 2014. Available:  
32  
33 [https://cebma.org/wp-content/uploads/Evidence-Based-Practice-The-Basic-Principles-vs-](https://cebma.org/wp-content/uploads/Evidence-Based-Practice-The-Basic-Principles-vs-Dec-2015.pdf)  
34  
35 [Dec-2015.pdf](https://cebma.org/wp-content/uploads/Evidence-Based-Practice-The-Basic-Principles-vs-Dec-2015.pdf) [Accessed 15 Apr 2021].  
36  
37  
38 55. Ramis MA, Chang A, Conway A, et al. Theory-based strategies for teaching evidence-  
39  
40 based practice to undergraduate health students: a systematic review. *BMC Med Educ*  
41  
42 2019;19:267.  
43  
44  
45 56. Sackett DL, Rosenberg WM, Gray JA, et al. Evidence based medicine: what it is and  
46  
47 what it isn't. *BMJ* 1996;312:71–2.  
48  
49  
50 57. Page MJ, McKenzie JE, Bossuyt PM, et al. The PRISMA 2020 statement: an updated  
51  
52 guideline for reporting systematic reviews. *BMJ* 2021;372:n71.  
53  
54  
55  
56  
57  
58  
59  
60

- 1  
2  
3 58. Joanna Briggs Institute. Joanna Briggs Institute reviewers' manual: 2014 edition, 2014.  
4  
5 Available: <https://nursing.lsuhsu.edu/JBI/docs/ReviewersManuals/Mixed-Methods.pdf>  
6  
7 [Accessed 15 Apr 2021].  
8  
9
- 10 59. Hoffmann TC, Glasziou PP, Boutron I, et al. Better reporting of interventions: template  
11  
12 for intervention description and replication (TIDieR) checklist and guide. *BMJ*  
13  
14 2014;348:g1687.  
15
- 16 60. Seehra J, Pandis N, Koletsi D, et al. Use of quality assessment tools in systematic reviews  
17  
18 was varied and inconsistent. *J Clin Epidemiol* 2016;69:179–84.e5.  
19
- 20 61. Higgins JP, Altman DG, Gøtzsche PC, et al. The Cochrane Collaboration's tool for  
21  
22 assessing risk of bias in randomised trials. *BMJ* 2011;343:d5928.  
23  
24
- 25 62. Centre for Reviews and Dissemination. Systematic reviews: CRD's guidance for  
26  
27 undertaking reviews in healthcare, 2009. Available:  
28  
29 [https://www.york.ac.uk/media/crd/Systematic\\_Reviews.pdf](https://www.york.ac.uk/media/crd/Systematic_Reviews.pdf) [Accessed 15 Apr 2021].  
30  
31  
32
- 33 63. Guyatt GH, Oxman AD, Akl EA, et al. GRADE guidelines: 1. Introduction – GRADE  
34  
35 evidence profiles and summary of findings tables. *J Clin Epidemiol* 2011;64:383–394.  
36  
37  
38
- 39 64. Williams LL. What goes around comes around: evidence-based management. *Nurs Adm*  
40  
41 *Q* 2006;30:243–51.  
42  
43  
44
- 45 65. Seidman G, Pascal L, McDonough J. What benefits do healthcare organisations receive  
46  
47 from leadership and management development programmes? A systematic review of the  
48  
49 evidence. *BMJ Leader* 2020;4:21–36.  
50  
51
- 52 66. McKenna J, Jeske D. Ethical leadership and decision authority effects on nurses'  
53  
54 engagement, exhaustion, and turnover intention. *J Adv Nurs* 2021;77:198–206.  
55  
56  
57  
58  
59  
60

1  
2  
3 67. International Council of Nurses. The Global Nursing shortage and Nurse Retention:  
4 Policy Brief, 2021. Available at: [https://www.icn.ch/sites/default/files/inline-](https://www.icn.ch/sites/default/files/inline-files/ICN%20Policy%20Brief_Nurse%20Shortage%20and%20Retention.pdf)  
5 files/ICN%20Policy%20Brief\_Nurse%20Shortage%20and%20Retention.pdf [Accessed  
6  
7  
8  
9  
10 15 Apr 2021].  
11  
12

### 13 **Authors' contributions**

14  
15  
16 MV: conception (generator of the review) and responsible for the study design, identifying  
17 preliminary literature for the background, writing the manuscript; TL: identifying preliminary  
18 literature for the background, planning search strategy for papers, writing the manuscript; KH:  
19 identifying preliminary literature for the background, planning search strategy for papers, writing  
20 the manuscript; JV: search strategy for papers, commenting on the manuscript; GL: commenting  
21 on the manuscript; YT: commenting on the manuscript; WC: commenting on the manuscript;  
22  
23 SH: commenting on the manuscript; XL: commenting on the manuscript.  
24  
25  
26  
27  
28  
29  
30  
31

### 32 **Funding**

33  
34  
35 The work was supported by the Finnish National Agency of Education, Asia Program, grant  
36 number 26/270/2020 and University of Turku (internal fund 26003424). The funders had no role  
37 in the study design and will not have any role during its execution, analysis, interpretation of the  
38 data, decision to publish, or preparation of the manuscript.  
39  
40  
41  
42  
43  
44

### 45 **Competing interests**

46  
47  
48 The authors declare that they have no competing interests.  
49  
50

### 51 **Acknowledgements**

1  
2  
3  
4  
5  
6  
7  
8  
9  
10  
11  
12  
13  
14  
15  
16  
17  
18  
19  
20  
21  
22  
23  
24  
25  
26  
27  
28  
29  
30  
31  
32  
33  
34  
35  
36  
37  
38  
39  
40  
41  
42  
43  
44  
45  
46  
47  
48  
49  
50  
51  
52  
53  
54  
55  
56  
57  
58  
59  
60

We would like to thank to Central South University, Xiangya School of Nursing and the University of Turku, Department of Nursing Science about their support of the protocol preparation.

For peer review only

**PRISMA-P (Preferred Reporting Items for Systematic review and Meta-Analysis Protocols) 2015 checklist: recommended items to address in a systematic review protocol\***

| Section and topic                 | Item No | Checklist item                                                                                                                                                                                                                | Page No |
|-----------------------------------|---------|-------------------------------------------------------------------------------------------------------------------------------------------------------------------------------------------------------------------------------|---------|
| <b>ADMINISTRATIVE INFORMATION</b> |         |                                                                                                                                                                                                                               |         |
| Title:                            |         |                                                                                                                                                                                                                               |         |
| Identification                    | 1a      | Identify the report as a protocol of a systematic review                                                                                                                                                                      | 1       |
| Update                            | 1b      | If the protocol is for an update of a previous systematic review, identify as such                                                                                                                                            | n/a     |
| Registration                      | 2       | If registered, provide the name of the registry (such as PROSPERO) and registration number                                                                                                                                    | 2, 8    |
| Authors:                          |         |                                                                                                                                                                                                                               |         |
| Contact                           | 3a      | Provide name, institutional affiliation, e-mail address of all protocol authors; provide physical mailing address of corresponding author                                                                                     | 1       |
| Contributions                     | 3b      | Describe contributions of protocol authors and identify the guarantor of the review                                                                                                                                           | 25      |
| Amendments                        | 4       | If the protocol represents an amendment of a previously completed or published protocol, identify as such and list changes; otherwise, state plan for documenting important protocol amendments                               | 17      |
| Support:                          |         |                                                                                                                                                                                                                               |         |
| Sources                           | 5a      | Indicate sources of financial or other support for the review                                                                                                                                                                 | 25      |
| Sponsor                           | 5b      | Provide name for the review funder and/or sponsor                                                                                                                                                                             | 25      |
| Role of sponsor or funder         | 5c      | Describe roles of funder(s), sponsor(s), and/or institution(s), if any, in developing the protocol                                                                                                                            | 25      |
| <b>INTRODUCTION</b>               |         |                                                                                                                                                                                                                               |         |
| Rationale                         | 6       | Describe the rationale for the review in the context of what is already known                                                                                                                                                 | 4-7     |
| Objectives                        | 7       | Provide an explicit statement of the question(s) the review will address with reference to participants, interventions, comparators, and outcomes (PICO)                                                                      | 7-8     |
| <b>METHODS</b>                    |         |                                                                                                                                                                                                                               |         |
| Eligibility criteria              | 8       | Specify the study characteristics (such as PICO, study design, setting, time frame) and report characteristics (such as years considered, language, publication status) to be used as criteria for eligibility for the review | 8-10    |
| Information sources               | 9       | Describe all intended information sources (such as electronic databases, contact with study authors, trial registers or other grey literature sources) with planned dates of coverage                                         | 10-11   |
| Search strategy                   | 10      | Present draft of search strategy to be used for at least one electronic database, including planned limits, such that it could be repeated                                                                                    | 10-11   |

|                                    |     |                                                                                                                                                                                                                                                  |        |
|------------------------------------|-----|--------------------------------------------------------------------------------------------------------------------------------------------------------------------------------------------------------------------------------------------------|--------|
| Study records:                     |     |                                                                                                                                                                                                                                                  |        |
| Data management                    | 11a | Describe the mechanism(s) that will be used to manage records and data throughout the review                                                                                                                                                     | 12     |
| Selection process                  | 11b | State the process that will be used for selecting studies (such as two independent reviewers) through each phase of the review (that is, screening, eligibility and inclusion in meta-analysis)                                                  | 12     |
| Data collection process            | 11c | Describe planned method of extracting data from reports (such as piloting forms, done independently, in duplicate), any processes for obtaining and confirming data from investigators                                                           | 13-14  |
| Data items                         | 12  | List and define all variables for which data will be sought (such as PICO items, funding sources), any pre-planned data assumptions and simplifications                                                                                          | 13-14  |
| Outcomes and prioritization        | 13  | List and define all outcomes for which data will be sought, including prioritization of main and additional outcomes, with rationale                                                                                                             | 10, 14 |
| Risk of bias in individual studies | 14  | Describe anticipated methods for assessing risk of bias of individual studies, including whether this will be done at the outcome or study level, or both; state how this information will be used in data synthesis                             | 14-15  |
| Data synthesis                     | 15a | Describe criteria under which study data will be quantitatively synthesised                                                                                                                                                                      | n/a    |
|                                    | 15b | If data are appropriate for quantitative synthesis, describe planned summary measures, methods of handling data and methods of combining data from studies, including any planned exploration of consistency (such as $I^2$ , Kendall's $\tau$ ) | n/a    |
|                                    | 15c | Describe any proposed additional analyses (such as sensitivity or subgroup analyses, meta-regression)                                                                                                                                            | n/a    |
|                                    | 15d | If quantitative synthesis is not appropriate, describe the type of summary planned                                                                                                                                                               | 17     |
| Meta-bias(es)                      | 16  | Specify any planned assessment of meta-bias(es) (such as publication bias across studies, selective reporting within studies)                                                                                                                    | 16-17  |
| Confidence in cumulative evidence  | 17  | Describe how the strength of the body of evidence will be assessed (such as GRADE)                                                                                                                                                               | 15     |

**\* It is strongly recommended that this checklist be read in conjunction with the PRISMA-P Explanation and Elaboration (cite when available) for important clarification on the items. Amendments to a review protocol should be tracked and dated. The copyright for PRISMA-P (including checklist) is held by the PRISMA-P Group and is distributed under a Creative Commons Attribution Licence 4.0.**

*From: Shamseer L, Moher D, Clarke M, Ghersi D, Liberati A, Petticrew M, Shekelle P, Stewart L, PRISMA-P Group. Preferred reporting items for systematic review and meta-analysis protocols (PRISMA-P) 2015: elaboration and explanation. BMJ. 2015 Jan 2;349(jan02 1):g7647.*

# BMJ Open

## MEASURED AND PERCEIVED IMPACTS OF EVIDENCE-BASED LEADERSHIP IN NURSING: A MIXED METHODS SYSTEMATIC REVIEW PROTOCOL

|                                 |                                                                                                                                                                                                                                                                                                                                                                                                                                                                                                                                                                                                                                                                    |
|---------------------------------|--------------------------------------------------------------------------------------------------------------------------------------------------------------------------------------------------------------------------------------------------------------------------------------------------------------------------------------------------------------------------------------------------------------------------------------------------------------------------------------------------------------------------------------------------------------------------------------------------------------------------------------------------------------------|
| Journal:                        | <i>BMJ Open</i>                                                                                                                                                                                                                                                                                                                                                                                                                                                                                                                                                                                                                                                    |
| Manuscript ID                   | bmjopen-2021-055356.R1                                                                                                                                                                                                                                                                                                                                                                                                                                                                                                                                                                                                                                             |
| Article Type:                   | Protocol                                                                                                                                                                                                                                                                                                                                                                                                                                                                                                                                                                                                                                                           |
| Date Submitted by the Author:   | 30-Sep-2021                                                                                                                                                                                                                                                                                                                                                                                                                                                                                                                                                                                                                                                        |
| Complete List of Authors:       | Välimäki, Maritta; University of Turku, Department of Nursing Science; Central South University, Xiangya Nursing School<br>Lantta, Tella; University of Turku, Department of Nursing Science<br>Hipp, Kirsi; University of Turku Faculty of Medicine, Department of Nursing Science<br>Varpula, Jaakko; University of Turku, Department of Nursing Science<br>Liu, Gaoming; Hunan Cancer Hospital<br>Tang, Yao; Central South University, Xiangya Nursing School<br>Chen, Wenjun; University of Ottawa, School of Nursing<br>Hu, Shuang; Central South University, The Third Xiangya Hospital<br>Li, Xianhong; Central South University, Xiangya School of Nursing |
| <b>Primary Subject Heading</b>: | Nursing                                                                                                                                                                                                                                                                                                                                                                                                                                                                                                                                                                                                                                                            |
| Secondary Subject Heading:      | Nursing                                                                                                                                                                                                                                                                                                                                                                                                                                                                                                                                                                                                                                                            |
| Keywords:                       | Organisational development < HEALTH SERVICES ADMINISTRATION & MANAGEMENT, Protocols & guidelines < HEALTH SERVICES ADMINISTRATION & MANAGEMENT, HEALTH SERVICES ADMINISTRATION & MANAGEMENT, Quality in health care < HEALTH SERVICES ADMINISTRATION & MANAGEMENT                                                                                                                                                                                                                                                                                                                                                                                                  |
|                                 |                                                                                                                                                                                                                                                                                                                                                                                                                                                                                                                                                                                                                                                                    |

SCHOLARONE™  
Manuscripts





I, the Submitting Author has the right to grant and does grant on behalf of all authors of the Work (as defined in the below author licence), an exclusive licence and/or a non-exclusive licence for contributions from authors who are: i) UK Crown employees; ii) where BMJ has agreed a CC-BY licence shall apply, and/or iii) in accordance with the terms applicable for US Federal Government officers or employees acting as part of their official duties; on a worldwide, perpetual, irrevocable, royalty-free basis to BMJ Publishing Group Ltd ("BMJ") its licensees and where the relevant Journal is co-owned by BMJ to the co-owners of the Journal, to publish the Work in this journal and any other BMJ products and to exploit all rights, as set out in our [licence](#).

The Submitting Author accepts and understands that any supply made under these terms is made by BMJ to the Submitting Author unless you are acting as an employee on behalf of your employer or a postgraduate student of an affiliated institution which is paying any applicable article publishing charge ("APC") for Open Access articles. Where the Submitting Author wishes to make the Work available on an Open Access basis (and intends to pay the relevant APC), the terms of reuse of such Open Access shall be governed by a Creative Commons licence – details of these licences and which [Creative Commons](#) licence will apply to this Work are set out in our licence referred to above.

Other than as permitted in any relevant BMJ Author's Self Archiving Policies, I confirm this Work has not been accepted for publication elsewhere, is not being considered for publication elsewhere and does not duplicate material already published. I confirm all authors consent to publication of this Work and authorise the granting of this licence.

1  
2  
3 **MEASURED AND PERCEIVED IMPACTS OF EVIDENCE-BASED LEADERSHIP IN**  
4 **NURSING: A MIXED METHODS SYSTEMATIC REVIEW PROTOCOL**  
5  
6  
7

8 VÄLIMÄKI Maritta, University of Turku, Department of Nursing Science, Turku, Finland and  
9 Central South University, Xiangya Nursing School, Changsha, China, mava@utu.fi

11 LANTTA Tella, University of Turku, Department of Nursing Science, Turku, Finland,  
12 tejela@utu.fi

14 HIPPI Kirsi, University of Turku, Department of Nursing Science, Turku, Finland,  
15 kirsi.hipp@utu.fi

17 VARPULA Jaakko, University of Turku, Department of Nursing Science, Turku, Finland,  
18 jaheva@utu.fi

20 LIU Gaoming, Hunan Cancer Hospital, Changsha, China, 354205223@qq.com

22 TANG Yao, Central South University, Xiangya Nursing School, Changsha, China,  
23 1079536059@qq.com

25 CHEN Wenjun, University of Ottawa, Ottawa, Canada, wchen140@uottawa.ca

27 HU Shuang, The Third Xiangya Hospital of Central South University, Changsha, China,  
28 1432306591@qq.com

30 LI Xianhong, Central South University, Xiangya Nursing School, Changsha, China,  
31 xianhong\_li@csu.edu.cn

33  
34  
35  
36 **Corresponding author:**

37 Xianhong Li, RN, PhD, FAAN, Xiangya Nursing School of Central South University

38 Address: 172 Tongzipo Road, Changsha, Hunan, 410013, P.R.China

39 Email: xianhong\_li@csu.edu.cn  
40  
41  
42  
43  
44

45 **Word count:** 3792  
46  
47  
48  
49  
50  
51  
52  
53  
54  
55  
56  
57  
58  
59  
60

## ABSTRACT

**Introduction:** Despite the abundance of existing literature on evidence-based nursing practice, knowledge regarding evidence-based leadership, i.e., leadership supported by an evidence-based approach, is lacking. Our aim is to conduct a mixed methods systematic review with qualitative and quantitative studies to examine how evidence is used to solve leadership problems and to describe the measured and perceived effects of evidence-based leadership on nurses and nurse leaders and their performance as well as on organizational and clinical outcomes.

**Methods and analysis:** We will search the following databases with no year limit or language restrictions: CINAHL (EBSCO), Cochrane Library, Embase (Elsevier), PsycINFO (EBSCO), PubMed (MEDLINE), Scopus (Elsevier) and Web of Science. In addition, the databases for prospectively registered trials and other systematic reviews will be screened. We will include articles using any type of research design as long as the study includes a component of an evidence-based leadership approach. Three reviewers will independently screen all titles, abstracts and full-text articles, and two reviewers will extract the data according to the appropriate checklists. The quality of each study will be appraised using specific appraisal tool fitting in study design used in each study. The Preferred Reporting Items for Systematic Reviews and Meta-Analyses (PRISMA) grid, the Meta-Analysis Protocols (PRISMA-P), SWiM, and ENTREQ will guide the study process and reporting. Outcomes related to individual or group performance of nurses or nurse managers regarding leadership skills (e.g., communication skills), organizational outcomes (e.g., work environment, costs), and clinical outcomes (e.g., patient quality of life, treatment satisfaction) will be extracted and synthesized.

**Ethics and dissemination:** This systematic review will not include empirical data, and therefore, ethics approval will not be sought. The results of the review will be disseminated in a peer-reviewed scientific journal and in a conference presentation.

**Systematic review registration:** PROSPERO CRD42021259624

## STRENGTHS AND LIMITATIONS OF THIS STUDY

- This mixed methods systematic review is justified by the lack of synthesized knowledge on impacts of evidence-based leadership in nursing, an issue that is needed to answer current challenges in health care.
- A comprehensive literature search using several electronic databases and a manual search will be supplemented.
- To ensure transparent and complete reporting, the protocol has been written following the PRISMA-P guidelines.
- To promote the dissemination and the use of evidence produced, the review findings will be validated in collaboration with nursing associations.

## INTRODUCTION

The nursing profession has an important role in addressing current and future health needs.[1] Today, around 20 million nurses make up nearly half of the global health workforce[2], and still, 5.9 million more nurses will be needed in the future to meet the global demand.[3] In improving global health, effective leadership is one of the contributions of nurses[3], and therefore, nurses must be empowered and enabled to lead to fulfill global requirements.[4] However, nurse leaders often lack skills in refined problem-solving and decision making[5], and their decisions are based on experience, intuition[6–7] or personal views.[8] Inconclusive, poor-quality or non-representative information can further lead to inappropriate and costly care decisions that impact organizations, staff and patients.[9–11]

The Royal College of Nursing[12] has emphasized the role of leadership in promoting direction, alignment, and commitment among teams and organizations. Therefore, leadership requires the ability to understand the situation that needs changing, the ability to communicate and adapt to new behaviors, and the ability to secure resources that will help goals be met.[13] For these requirements, evidence-based knowledge has an impactful role.[14] A large knowledge base already exists related to leadership among different professionals in health care.[15–18] Previous literature reviews have also focused on the roles and behaviors of leaders in implementing evidence-based knowledge into clinical practice[16–19] as well as how leaders can inhibit nurses' competency and knowledge management in the organization.[20] More recently, literature reviews have focused on how evidence has been used by leaders themselves to solve managerial problems in health care. In this task, evidence-based management (EBMgt), defined as how the best available scientific evidence is used, has been incorporated in making managerial decisions. Four elements in practicing EBMgt are crucial: external scientific evidence,

1  
2  
3 practitioner's experience and judgment, stakeholders' preferences or values, and different  
4 contexts and organizational factors.[14, 21]  
5  
6

7  
8 We systematically searched and found six reviews related to leadership and an evidence-based  
9 approach. Young[22] focused on definitions and acceptance of evidence-based management  
10 (EBMgt) in health care, while Hasanpoor et al.[23] identified facilitators and barriers, sources of  
11 evidence used, and the role of evidence in the process of decision-making. Both reviews[22–23]  
12 concluded that EBMgt was emphasized but limitedly used. Other identified problems included a  
13 lack time and a lack of research on management activities, and policy constraints [22].  
14  
15

16  
17 Roshanghalb et al.[24] concluded that leaders based their decisions mainly on published studies,  
18 real world evidence and experts' opinions, while Jaana et al.[25] found that systematic reviews  
19 and meta-analyses rarely provided evidence of management-related interventions. In addition,  
20 Tate et al.[10] reviewed the effectiveness of interventions in enhancing leaders' use of research  
21 evidence.  
22  
23

24  
25 Despite the wide range of existing literature related to an evidence-based approach used by  
26 leaders in health care contexts, as far as we are aware, the concept of evidence-based leadership  
27 has only been used in one review, by Geerts et al.[9], who focused on physician leadership  
28 development interventions. Therefore, a clear knowledge gap can be identified in the literature  
29 regarding how an evidence-based approach could be used to support the role of nurse leaders and  
30 what the impact of the evidence is on nurses and nurse leaders themselves as well as on clinical  
31 practice and organizational outcomes. This topic is important as evidence-based management is  
32 already considered to produce the best professional practice.[26] However, health care leaders in  
33 nursing have somehow escaped the call for the use of evidence in their own practice.[8] Nurse  
34 leaders do not use research evidence in their management practice[10], and they acknowledge  
35  
36  
37  
38  
39  
40  
41  
42  
43  
44  
45  
46  
47  
48  
49  
50  
51  
52  
53  
54  
55  
56  
57  
58  
59  
60

1  
2  
3 personal[27] and professional experience[26] over research evidence. Evidence-based  
4  
5 knowledge in the context of leadership is still important, not only in supporting research or  
6  
7 clinical practice but also in guiding management and leadership decisions.[9] Therefore, the time  
8  
9 has come for nursing leaders to join clinicians in using the strongest evidence available to effect  
10  
11 change and guide decision making.[28]  
12  
13

14  
15 To promote leadership in nursing,[2] we postulate that evidence-based approaches should be  
16  
17 used in supporting leadership in nursing.[8] To answer the global call for nurses,[1, 3] this  
18  
19 systematic review aims to examine how evidence is used to solve leadership problems and to  
20  
21 describe the measured and perceived effects of evidence-based leadership on nurses and nurse  
22  
23 leaders and their performance, as well as organizational and clinical outcomes. We will use a  
24  
25 mixed methods approach by combining both qualitative and quantitative studies to provide  
26  
27 greater insights into the available literature[29] and synthesize the existing knowledge on how  
28  
29 evidence is used to solve leadership problems and support leadership in daily nursing practice,  
30  
31 and what the impact of the evidence-based leadership style is. The information to be gained by  
32  
33 using rigorous research methods is needed for developing nursing leadership practices in the  
34  
35 future. As the American Nurses Association has stated, registered nurses should demonstrate  
36  
37 leadership in their profession, and therefore, nurses' leadership competences should be  
38  
39 strengthened.[30] Our review can direct education efforts for nurse leaders toward more effective  
40  
41 leadership styles. The ability of nurse leaders to use and critically appraise research evidence  
42  
43 may influence the way policy is enacted and how resources and staff are utilized to meet certain  
44  
45 objectives set by policy, which can influence staff and workforce outcomes.[10] The information  
46  
47 of this systematic review could therefore be used to inform service provisions of the best  
48  
49 investment methods for the future nursing workforce. Further, the review could provide direction  
50  
51  
52  
53  
54  
55  
56  
57  
58  
59  
60

1  
2  
3 for researchers in choosing their future research topics to fill the knowledge gap in the  
4 effectiveness of evidence-based leadership styles. We therefore expect that this systematic  
5 review will gain evidence that will benefit nursing leaders in health care organizations  
6 worldwide.  
7  
8  
9  
10  
11  
12

### 13 **Study objectives**

14  
15 The overall aim of this mixed methods systematic review is to examine how evidence is used to  
16 solve leadership problems and to describe the measured and perceived effects of evidence-based  
17 leadership on nurses and nurse leaders and their performance as well as organizational and  
18 clinical outcomes. The review questions are as follows: (1) What leadership problems are solved  
19 using an evidence-based approach? (2) What are the main features in evidence-based leadership?  
20 (3) What are the perceived effects of evidence-based leadership on nurses' performance,  
21 organizational and clinical outcomes? (4) What are the measured effects of evidence-based  
22 leadership on nurses' performance, organizational and clinical outcomes?  
23  
24  
25  
26  
27  
28  
29  
30  
31  
32  
33

## 34 **METHODS AND ANALYSIS**

### 35 **Design**

36  
37 In this review, we will use a mixed methods approach[29] combining narrative and quantitative  
38 synthesis to appraise and synthesize empirical evidence. In this approach, a comprehensive  
39 synthesis of two or more types of data is first performed and then aggregated into a combined  
40 synthesis.[29] The approach is usable in our review as it provides the potential for gaining a  
41 more complete picture and holistic understanding of the topic; our review focuses on a wide  
42 range of questions, not only those relating to the effectiveness of a particular intervention but  
43 also to describe the existing situation.[31]  
44  
45  
46  
47  
48  
49  
50  
51  
52  
53  
54  
55  
56  
57  
58  
59  
60

To ensure transparent and complete reporting, this review protocol is designed in accordance with the Preferred Reporting Items for Systematic Reviews and Meta-Analyses (PRISMA[32]) grid, the Meta-Analysis Protocols (PRISMA-P[33]), the guideline for Synthesis Without Meta-analysis (SWiM) items,[34] and the synthesis of qualitative research (ENTREQ) statement.[35] The review protocol has been registered with CRD42021259624 in PROSPERO (International Prospective Register of Systematic Reviews).

## **Eligibility criteria**

### **Study design**

Articles using any type of research design will be included as long as the study includes a topic of leadership and any component of an evidence-based leadership approach.

### **The PICO**

The PICO (population, intervention, comparison, outcome) approach will be used to specify the eligibility of studies.

*Population (P):* Articles should include nurses, nurse managers or other nursing staff working in a health care context. They can have an official or unofficial managerial role as leadership occurs whenever a person attempts to influence the behavior of individuals or a group based on personal goals or for the goals of others congruent with organizational goals.[13] Articles involving other health care professionals will be excluded if nurses are not clear majority (50% or more) in the sample.

*Intervention (I):* Leadership refers to the process of when a person attempts to influence the behavior of individuals or a group in an organization for any reason,[13] while evidence-based leadership is when the behavior of individuals or a group is affected using an evidence-based



1  
2  
3 approach. We propose that evidence-based leadership is analogous to evidence-based  
4 management,[14, 21] but the role or position of the leader may not always be assigned or  
5  
6 officially approved of by the organization.  
7  
8  
9

10 We assume that evidence-based leadership is a process that includes the following steps: 1) a  
11 practitioner identifies a clearly stated leadership problem, question, or issue in their practice, 2)  
12 organizational evidence or data about the leadership problem or issue are collected and analyzed  
13 to check for relevance and validity, and the problem is restated, reformulated or made more  
14 specific, 3) scientific evidence from published research about the leadership problem is  
15 researched, identified and critically appraised, 4) the views of stakeholders (patients, clinicians,  
16 family members, for example) are considered, together with ethical implications of the decision,  
17 and 5) all sources of information are critically appraised.[36] The articles to be included in this  
18 review should identify some or all of the five steps of the EBP process.[37, 38]  
19  
20  
21  
22  
23  
24  
25  
26  
27  
28  
29  
30  
31

32 *Comparison (C):* If an included study has used a randomized trial design, we will include  
33 another type of intervention as a comparison.  
34  
35  
36

### 37 *Outcomes*

38 Studies will describe any outcomes related to individual or group performance of nurses or nurse  
39 managers regarding leadership skills (e.g., communication skills), organizational outcomes (e.g.,  
40 work environment, costs), health care provider outcomes (e.g., job satisfaction), or clinical  
41 outcomes (e.g., patient quality of life, treatment satisfaction).  
42  
43  
44  
45  
46  
47  
48

### 49 *Other*

1  
2  
3 Articles will be limited to peer-reviewed, published full-text articles. There will be no language  
4 restriction. Theoretical papers, statistical reviews, books and book chapters, letters, dissertations,  
5 editorials, and study protocols will be excluded.  
6  
7  
8  
9

## 10 **Data sources**

11  
12  
13 A comprehensive literature search, with no specific year limits, will be conducted. The following  
14 electronic databases will be used: CINAHL (EBSCO), Cochrane Library (academic database for  
15 medicine and health science and nursing), Embase (Elsevier), PsycINFO (EBSCO), PubMed  
16 (MEDLINE), Scopus (Elsevier) and Web of Science (academic database across all scientific and  
17 technical disciplines, ranging from medicine and social sciences to arts and humanities). These  
18 databases will allow for a wide literature search within our review topic. The reference lists of  
19 the selected papers will also be screened for additional studies. If a high number of studies are  
20 found using a hand search, the search strategy will be modified.[39]  
21  
22  
23  
24  
25  
26  
27  
28  
29  
30  
31

## 32 **Search strategy**

33  
34  
35 The search strategy will be elaborated upon and implemented prior to the study selection. We  
36 will use the PRISMA-P checklist for guidance as well as a controlled vocabulary thesaurus (such  
37 as medical subject heading terms, CINAHL headings, PsycINFO thesaurus). The keywords for  
38 each database are “nurse leader” or similar terms that describe a nurse’s position as a leader,  
39 manager or administrator; “evidence-based leadership” or similar terms that describe practice as  
40 being founded on evidence; and “leadership” and its synonyms and other similar terms that  
41 describe the actions of nurse leaders. Each keyword has been verified for each database.  
42  
43  
44  
45  
46  
47  
48  
49

50 The search terms will be combined using the Boolean operators “AND” and “OR.” Advice on  
51 using keywords to search for studies has been sought from a librarian of the faculty of medicine  
52  
53  
54  
55  
56  
57  
58  
59

1  
2  
3 at the University of Turku. Full search strategies to be used across databases are described in a  
4  
5 supplementary file.  
6

### 7 **Data management**

8  
9  
10 A reference management software will be used to efficiently manage records, document the  
11  
12 process, and manage duplicate study papers.  
13  
14

### 15 **Selection process**

16  
17  
18 The study selection process will consist of four steps (Figure 1).[32] First, titles and abstracts  
19  
20 will be independently assessed by three authors (MV, KH, TL) according to the inclusion  
21  
22 criteria. Second, the abstracts of the papers will be screened for relevance and eligibility, by the  
23  
24 same three authors (MV, KH, TL). Third, the full texts of the selected abstracts will be obtained.  
25  
26 If access to any full-text article is lacking, we will contact the study authors to obtain the full text  
27  
28 or the findings of the study. All full-text articles will then be screened by three authors (MV, KH,  
29  
30 XL) according to the inclusion and exclusion criteria. In cases of discrepancy between the three  
31  
32 screening authors, the paper will be discussed with another author (TL). Papers that do not meet  
33  
34 the inclusion criteria will be rejected, and the reason for exclusion will be recorded to increase  
35  
36 transparency in the selection process. Fourth, the full texts of the studies that meet the inclusion  
37  
38 criteria will be obtained for further detailed assessment. The reference lists of the selected papers  
39  
40 will also be screened and checked for additional papers that meet the inclusion criteria (JV, GL).  
41  
42  
43  
44  
45

46 Figure 1 about here  
47

### 48 **Data collection and extraction process**

49  
50  
51 To answer the review questions, specific tables will be created to collect data from selected  
52  
53 papers. The effectiveness data will be extracted by three authors (TL, MV, WC) and the tabled  
54  
55 extractions will be reviewed for completeness and accuracy by another author (XL).  
56  
57  
58  
59  
60

1  
2  
3 Quantitative data will be extracted from papers included in the review using the standardized  
4 data extraction tool from JBI-MAStARI.[29] The data extracted will include specific details  
5 about each study. Details of the evidence-based leadership interventions will be extracted  
6 following the TIDieR checklist:[40] brief name; why the intervention is essential; materials and  
7 procedures; providers and their expertise; models of delivery; location and infrastructure;  
8 sessions; tailoring; modifications; planned and actual adherence or fidelity. The intervention data  
9 will be extracted by two authors (JV, KH).

10 Qualitative data to answer the research questions will be extracted from papers included in the  
11 review using the standardized data extraction tool from JBI-QARI.[29] The data extracted will  
12 include outcomes significant to the review question and the specific objectives. If available,  
13 economic data will be extracted from papers included in the review using the standardized data  
14 extraction tool from JBI-ACTUARI.[29]

15 Relevant results from included papers will be extracted and inputted into predesigned tables by  
16 three authors (YT, SH, WC); the process will be validated with the following steps with the  
17 guidance of MV. First, at the beginning of the extraction process, the authors (YT, SH, WC) will  
18 familiarize themselves with study data. Second, the three authors will independently extract data  
19 from the first five studies using the pre-prepared tables. Third, the authors will meet to discuss  
20 and determine whether their approaches to data extraction are consistent with each other's  
21 extraction, the research question and the purpose of the review. Fourth, the data extraction form  
22 will be refined if any uncertainties are found. The authors will again review a study as many  
23 times is necessary to achieve common agreement within this stage.[41]

### 24 **Risk of bias in individual studies**

1  
2  
3 The quality of each study will be appraised using different appraisal tools selected based on the  
4 study design used in the specific study. Qualitative studies will be assessed using the Critical  
5 Appraisal Skills Programme (CASP) checklists for qualitative research.[42] The quantitative  
6 studies will be assessed using the STROBE checklist for cohort, case-control and cross-sectional  
7 studies,[43] while the Cochrane Collaboration's tool for assessing risk of bias in randomized  
8 trials will be used to assess the quality of randomized trial articles included in the review.[44] In  
9 addition, the mixed methods studies will be appraised using the Mixed Methods Appraisal  
10 Tool.[45] Three reviewers (YT, SH, XL) will conduct the assessment. Any disagreement  
11 between the reviewers will be resolved by discussion or by requesting the assessment of a fourth  
12 reviewer (XL).

### 26 **Data synthesis**

27  
28  
29 In this mixed methods systematic review, we will use segregated methodology, in which the  
30 qualitative, quantitative and economic data are synthesized separately prior to reaching mixed  
31 methods synthesis.[46] First, to form a clear descriptive summary of the included studies, a  
32 narrative synthesis will be conducted by summarizing the tabulated study details. The content of  
33 each study will also be summarized to answer the descriptive review objectives.[47] With  
34 narrative synthesis we are referring to a synthesis of findings from multiple studies that relies  
35 primarily on textual approach and the use of words and text to summarize and explain the  
36 findings from the included studies.[48] Narrative synthesis of effectiveness data will also be used  
37 if statistical meta-analysis is not possible or advisable.[49] The methods used to synthesize the  
38 effects for each outcome and assess the certainty of the synthesis findings will be described and  
39 justified when it is not possible to undertake a meta-analysis of effect estimates. This descriptive  
40 process will be conducted explicitly and rigorously. Decisions on how to group and synthesize  
41  
42  
43  
44  
45  
46  
47  
48  
49  
50  
51  
52  
53  
54  
55  
56  
57  
58  
59  
60

1  
2  
3 tabulated data will be made based on the review protocol, review questions, and with the support  
4  
5 of existing guidelines on how to synthesize and report qualitative systematic reviews (SWiM[34],  
6  
7 ENTREQ[35]). Second, a statistical meta-analysis based on the RCT studies will be conducted  
8  
9 only if the usable data is available. The Grading of Recommendations Assessment, Development  
10  
11 and Evaluation (GRADE) will be used to evaluate the quality of evidence.[50] Further, economic  
12  
13 findings, where possible, will be pooled using JBI-ACTUARI[29] and presented in a tabular  
14  
15 summary. If this is not possible, findings will be presented in narrative form only. Finally, in a  
16  
17 mixed methods synthesis, qualitative findings will be used to contextualize the meta-analytical  
18  
19 results and generate possible reasons behind the quantitative data, when usable.[29]  
20  
21  
22  
23

24 To add to the rigorousness of the review, the results will be validated in close collaboration with  
25  
26 national and international nursing associations. This will, in turn, offer additional sources of  
27  
28 information, perspectives, meaning, and applicability to the review results.[51] We will invite  
29  
30 appropriate stakeholders, around 10–20 nurses or nurse leaders, to take part in the survey. We  
31  
32 will first share with them the review results and then ask them to answer the prespecified open-  
33  
34 ended questions in written format; the responses will be analyzed using content analysis. The  
35  
36 stakeholders will then be invited to join a face-to-face meeting to discuss the summary of the  
37  
38 feedback. The conclusion of the validation process will be integrated into the review outcomes  
39  
40 by reporting the experience in the discussion part of the review. We assume that sharing the  
41  
42 preliminary review results with stakeholders is necessary to achieve a higher level of meaning in  
43  
44 our review results, support the feedback from the content experts, and offer new perspectives on  
45  
46 our preliminary findings.[41] We also believe that the validation of the results will offer an ideal  
47  
48 mechanism for enhancing the validity of the study outcome while translating the findings for the  
49  
50 global audience.  
51  
52  
53  
54  
55  
56  
57  
58  
59  
60

### **Patient and public involvement**

There will be no patient or public involvement in the study.

### **ETHICS AND DISSEMINATION**

No data collection for the systematic review will involve human subjects, and therefore no ethical approval will be required. The results will be disseminated in a peer-reviewed journal and in a conference presentation.

### **DISCUSSION**

In the course of a decade, the call for evidence has swept the health care landscape in medicine and more recently in nursing. As the future of nursing success depends on strong leaders, nurses need to feel secure in their leadership and have confidence that their managers are reliable and educated about the best ways to manage situations.[8] Good leadership in health organizations has the potential to positively impact employees' well-being, for example, an increase in work engagement and a decrease in exhaustion and turnover intention.[52] This is highly important as the existing nursing shortage, the ageing of the nursing workforce, and the COVID-19 pandemic has created an alarming situation in health care settings globally. The International Council of Nurses has already estimated that up to 13 million nurses will be needed to fill the future global nurse shortage gap.[53] Strong evidence-based leadership in nursing is therefore needed more than ever before. Therefore, to attract new generations of nurses to the health care business, and to cost-effectively run health care organizations, nursing leaders who based their leadership decisions on the best available evidence are needed. Therefore, in this systematic review, we will examine how evidence is used to solve leadership problems and describe the measured and

1  
2  
3 perceived effects of evidence-based leadership on nurses and nurse managers' performance,  
4  
5 organizational and clinical outcomes.  
6  
7

8  
9 Our systematic review may also include shortcomings and limitations, which need to be taken  
10 into account. First, despite a wide search strategy, we may miss studies not included in the major  
11 international databases. This could potentially result in less generalizable findings outside of the  
12 English language. We also predict that it is not possible to conduct a meta-analysis to reveal the  
13 effectiveness of evidence-based leadership if the designs of the studies are too different or if the  
14 outcomes measured are not sufficiently similar for an average result across the studies to be  
15 meaningful, or if there are concerns about the quality of the studies.[54] We may also find a  
16 limited number of studies in which all—or even few—of the elements of an evidence-based  
17 approach are used. Despite the possible limited number of RCT studies from which to pool  
18 quantitative evidence, we still assume that using a narrative synthesis will provide good  
19 groundwork for the topic to be used to satisfy future needs in the nursing workforce. On the other  
20 hand, our narrative synthesis can hypothetically be biased, especially if selected results are over  
21 emphasized without clear justification or the conclusions are made based on subjective  
22 interpretations due to a lack of transparency in how the data were presented and how the  
23 conclusions were reached in the systematic reviews.[55] Other risks in our data synthesis could  
24 be a lack of description of the methods used, unclear links between the included data, the  
25 synthesis, and the conclusions, and inadequate reporting of the limitations of the synthesis.[34]  
26  
27  
28  
29  
30  
31  
32  
33  
34  
35  
36  
37  
38  
39  
40  
41  
42  
43  
44  
45  
46  
47  
48

49 To avoid possible methodological shortcomings, a rigorous data synthesis will be conducted. Our  
50 proposed protocol is registered with pre-defined methods to add transparency and reliability of  
51 our review results; a review registration is still lacking in many previous reviews.[56] Our  
52  
53  
54  
55  
56  
57  
58  
59  
60



1  
2  
3 review process and its reporting are guided by rigorous guidelines such as PRISMA, PRISMA-P,  
4  
5 SWiM and ENTREQ. The results will be stronger and more complete than those of other reviews  
6  
7 in terms of a comprehensive literature search. Our systematic review is also strengthened by a  
8  
9 mixed methods approach combining a narrative synthesis and meta-analysis, which both appear  
10  
11 to make different contributions to a systematic review and add meaning and value to the  
12  
13 findings.[29] In addition, the results of the review might have an added value compared to  
14  
15 previous systematic reviews concerning leadership and an evidence-based approach, as most  
16  
17 existing systematic reviews describe the role of nurse leaders in implementing and maintaining  
18  
19 evidence-based nursing. Therefore, our mixed methods review will fill the gap regarding how  
20  
21 nurse leaders themselves use evidence to guide their leadership role and what the measured and  
22  
23 perceived impact of evidence-based leadership is in nursing.  
24  
25  
26  
27  
28

### 29 **Amendments**

30 Any amendments to this protocol will be documented.  
31  
32  
33

### 34 **Planned start and end date**

35 The review is planned to start on 1 January 2022 and end on 30 June 2022.  
36  
37  
38

### 39 **REFERENCES**

- 40  
41 1. National Academy of Medicine. The future of nursing 2020-2030: Charting a path to  
42  
43 achieve health equity: a consensus study from the National Academy of Medicine, 2021.  
44  
45 Available: <https://nam.edu/publications/the-future-of-nursing-2020-2030/> [Accessed 15  
46  
47 Apr 2021].  
48  
49  
50 2. The Lancet. 2020: unleashing the full potential of nursing. *Lancet* 2019;394:1879.  
51  
52  
53  
54  
55  
56  
57  
58  
59  
60

- 1  
2  
3 3. World Health Organization. Nursing and midwifery, 2020. Available:  
4  
5 <https://www.who.int/news-room/fact-sheets/detail/nursing-and-midwifery> [Accessed 15  
6  
7 Apr 2021].  
8  
9
- 10 4. Nkengasong JN, Raji T, Ferguson SL, et al. Nursing leadership in Africa and health  
11  
12 security. *EClinicalMedicine* 2021;36:100930.  
13
- 14 5. Miltner RS, Jukkala A, Dawson MA, et al. Professional development needs of nurse  
15  
16 managers. *J Contin Educ Nurs* 2015;46:252–8.  
17  
18
- 19 6. Dever KH. Through the eyes of nurse managers in long-term care: identifying perceived  
20  
21 competencies and skills. *J Gerontol Nurs* 2018;44:32–8.  
22  
23
- 24 7. Effken JA, Verran JA, Logue MD, et al. Nurse managers' decisions: fast and favoring  
25  
26 remediation. *J Nurs Adm* 2010;40:188–95.  
27  
28
- 29 8. Shingler-Nace A, Gonzalez JZ. EBM: A pathway to evidence-based nursing  
30  
31 management. *Nursing* 2017;47:43–6.  
32  
33
- 34 9. Geerts JM, Goodall AH, Agius S. Evidence-based leadership development for  
35  
36 physicians: a systematic literature review. *Soc Sci Med* 2020;246:112709.  
37  
38
- 39 10. Tate K, Hewko S, McLane P, et al. Learning to lead: a review and synthesis of literature  
40  
41 examining health care managers' use of knowledge. *J Health Serv Res Policy*.  
42  
43 2019;24(1):57–70.  
44  
45
- 46 11. Kyratsis Y, Ahmad R, Hatzaras K, et al. Making Sense of Evidence in Management  
47  
48 Decisions: The Role of Research-Based Knowledge on Innovation Adoption and  
49  
50 Implementation in Health Care. Southampton: NIHR Journals Library 2014.  
51  
52  
53  
54  
55  
56  
57  
58  
59

- 1  
2  
3 12. Royal College of Nursing. Leadership, 2021. Available: [https://www.rcn.org.uk/clinical-](https://www.rcn.org.uk/clinical-topics/clinical-governance/leadership)  
4  
5 [topics/clinical-governance/leadership](https://www.rcn.org.uk/clinical-topics/clinical-governance/leadership) [Accessed 15 Apr 2021].  
6
- 7  
8 13. Hersey P, Campbell R. Leadership: A Behavioral Science Approach. CA: Leadership  
9  
10 Studies Publishing 2004.  
11
- 12 14. Briner RB, Denyer D, Rousseau DM. Evidence-based management: concept cleanup  
13  
14 time? *The Academy of Management Perspectives* 2009;23:19–32.  
15
- 16 15. Reed BN, Klutts AM, Mattingly TJ 2nd. A systematic review of leadership definitions,  
17  
18 competencies, and assessment methods in pharmacy education. *Am J Pharm Educ*  
19  
20 2019;83:7520.  
21
- 22 16. Berghout MA, Fabbriotti IN, Buljac-Samardžić M, et al. Medical leaders or masters? A  
23  
24 systematic review of medical leadership in hospital settings. *PLoS One*  
25  
26 2017;12:e0184522.  
27
- 28 17. Hanks S, Cotton D, Spowart L. Leadership in dental practice: a three stage systematic  
29  
30 review and narrative synthesis. *J Dent* 2020;102:103480.  
31
- 32 18. Reichenpfader U, Carlford S, Nilsen P. Leadership in evidence-based practice: a  
33  
34 systematic review. *Leadersh Health Serv* 2015;28:298–316.  
35
- 36 19. Gifford WA, Squires JE, Angus DE, et al. Managerial leadership for research use in  
37  
38 nursing and allied health care professions: a systematic review. *Implement Sci*  
39  
40 2018;13:127.  
41
- 42 20. Lunden A, Teräs M, Kvist T, et al. A systematic review of factors influencing knowledge  
43  
44 management and the nurse leaders' role. *J Nurs Manag* 2017;25:407–20.  
45  
46  
47  
48  
49  
50  
51  
52  
53  
54  
55  
56  
57  
58  
59  
60

- 1  
2  
3 21. Goodman JS, Gary MS, Wood RE. Bibliographic search training for evidence-based  
4 management education: a review of relevant literatures. *Academy of Management*  
5  
6 *Learning & Education* 2014;13:322–53.  
7  
8  
9  
10 22. Young SK. Evidence-based management: a literature review. *J Nurs Manag*  
11  
12 2002;10:145–51.  
13  
14  
15 23. Hasanpoor E, Hajebrahimi S, Janati A, et al. Barriers, facilitators, process and sources of  
16 evidence for evidence-based management among health care managers: a qualitative  
17  
18 systematic review. *Ethiop J Health Sci* 2018;28:665–80.  
19  
20  
21  
22  
23 24. Roshanghalb A, Lettieri E, Aloini D, et al. What evidence on evidence-based  
24 management in healthcare? *Management Decision* 2018;56:2069–84.  
25  
26  
27  
28 25. Jaana M, Vartak S, Ward MM. Evidence-based health care management: what is the  
29 research evidence available for health care managers? *Eval Health Prof* 2014;37:314–34.  
30  
31  
32  
33 26. Guo R, Berkshire SD, Fulton LV, et al. Use of evidence-based management in healthcare  
34 administration decision-making. *Leadersh Health Serv* 2017;30:330–42.  
35  
36  
37  
38 27. Liang ZZ, Howard PP, Rasa JJ. Evidence-informed managerial decision-making: what  
39 evidence counts? *Asia Pac J Health Manag* 2011;6:23–9.  
40  
41  
42  
43 28. Williams LL. What goes around comes around: evidence-based management. *Nurs Adm*  
44 *Q* 2006;30:243–51.  
45  
46  
47  
48 29. Joanna Briggs Institute. Joanna Briggs Institute reviewers' manual: 2014 edition, 2014.  
49 Available: <https://nursing.lsuhsu.edu/JBI/docs/ReviewersManuals/Mixed-Methods.pdf>  
50  
51 [Accessed 15 Apr 2021].  
52  
53  
54  
55  
56  
57  
58  
59  
60

- 1  
2  
3  
4  
5  
6  
7  
8  
9  
10  
11  
12  
13  
14  
15  
16  
17  
18  
19  
20  
21  
22  
23  
24  
25  
26  
27  
28  
29  
30  
31  
32  
33  
34  
35  
36  
37  
38  
39  
40  
41  
42  
43  
44  
45  
46  
47  
48  
49  
50  
51  
52  
53  
54  
55  
56  
57  
58  
59  
60
30. American Nurses Association. ANA Leadership Competency Model, 2018. Available: <https://www.nursingworld.org/~4a0a2e/globalassets/docs/ce/177626-ana-leadership-booklet-new-final.pdf> [Accessed 15 Apr 2021].
31. Grant MJ, Booth A. A typology of reviews: an analysis of 14 review types and associated methodologies. *Health Info Libr J* 2009;26:91–108.
32. Page MJ, McKenzie JE, Bossuyt PM, et al. The PRISMA 2020 statement: an updated guideline for reporting systematic reviews. *BMJ* 2021;372:n71.
33. Shamseer L, Moher D, Clarke M, et al. Preferred reporting items for systematic review and meta-analysis protocols (PRISMA-P) 2015: elaboration and explanation. *BMJ* 2015;350:g7647.
34. Campbell M, McKenzie JE, Sowden A, et al. Synthesis without meta-analysis (SWiM) in systematic reviews: reporting guideline. *BMJ* 2020;368:l6890.
35. Tong A, Flemming K, McInnes E, Oliver S, Craig J. Enhancing transparency in reporting the synthesis of qualitative research: ENTREQ. *BMC Med Res Methodol*. 2012 Nov 27;12:181.
36. Barends E, Rousseau DM, Briner RB. Evidence-Based Management: The Basic Principles. The Center for Evidence-Based Management, 2014. Available: <https://cebma.org/wp-content/uploads/Evidence-Based-Practice-The-Basic-Principles-vs-Dec-2015.pdf> [Accessed 15 Apr 2021].
37. Ramis MA, Chang A, Conway A, et al. Theory-based strategies for teaching evidence-based practice to undergraduate health students: a systematic review. *BMC Med Educ* 2019;19:267.

- 1  
2  
3 38. Sackett DL, Rosenberg WM, Gray JA, et al. Evidence based medicine: what it is and  
4  
5 what it isn't. *BMJ* 1996;312:71–2.  
6  
7  
8  
9 39. Vassar M, Johnson AL, Sharp A, et al. Citation bias in otolaryngology systematic  
10  
11 reviews. *J Med Libr Assoc* 2021;109(1):62–7.  
12  
13 40. Vassar M, Page MJ, Glasbey J, et al. Evaluation of the completeness of intervention  
14  
15 reporting in Cochrane surgical systematic reviews using the TIDieR-SR checklist: a  
16  
17 cross-sectional study. *BMJ Evid Based Med* 202;26:51–2.  
18  
19  
20 41. Levac D, Colquhoun H, O'Brien KK. Scoping studies: advancing the methodology.  
21  
22 *Implement Sci* 2010;5:69.  
23  
24  
25 42. Critical Appraisal Skills Programme. CASP Qualitative Studies Checklist, 2019.  
26  
27 Available: <https://casp-uk.net/casp-tools-checklists/> [Accessed 15 Aug 2021].  
28  
29  
30 43. von Elm E, Altman DG, Egger M, et al. The Strengthening the Reporting of  
31  
32 Observational Studies in Epidemiology (STROBE) statement: guidelines for reporting  
33  
34 observational studies. *J Clin Epidemiol* 2008;61:344–9.  
35  
36  
37 44. Higgins JP, Altman DG, Gøtzsche PC, et al. The Cochrane Collaboration's tool for  
38  
39 assessing risk of bias in randomised trials. *BMJ* 2011;343:d5928.  
40  
41  
42 45. Hong QN, Pluye P, Fàbregues S, et al. Mixed Methods Appraisal Tool (MMAT) Version  
43  
44 2018: user guide. Available:  
45  
46 [http://mixedmethodsappraisaltoolpublic.pbworks.com/w/file/attach/127916259/MMAT\\_2](http://mixedmethodsappraisaltoolpublic.pbworks.com/w/file/attach/127916259/MMAT_2018_criteria-manual_2018-08-01_ENG.pdf)  
47  
48 [018\\_criteria-manual\\_2018-08-01\\_ENG.pdf](http://mixedmethodsappraisaltoolpublic.pbworks.com/w/file/attach/127916259/MMAT_2018_criteria-manual_2018-08-01_ENG.pdf) [Accessed 15 Aug 2021].  
49  
50  
51 46. Sandelowski M, Voils CI, Barroso J. Defining and designing mixed research synthesis  
52  
53 studies. *Res Sch* 2006;13:29.  
54  
55  
56  
57  
58  
59  
60

- 1  
2  
3 47. Centre for Reviews and Dissemination. Systematic reviews: CRD's guidance for  
4  
5 undertaking reviews in healthcare, 2009. Available:  
6  
7 [https://www.york.ac.uk/media/crd/Systematic\\_Reviews.pdf](https://www.york.ac.uk/media/crd/Systematic_Reviews.pdf) [Accessed 15 Apr 2021].  
8  
9
- 10 48. Popay JH, Roberts A, Sowden M, et al. Guidance on the conduct of narrative synthesis in  
11  
12 systematic reviews: a product from the ESRC Methods Programme, 2006. Available:  
13  
14 [https://www.lancaster.ac.uk/media/lancaster-university/content-](https://www.lancaster.ac.uk/media/lancaster-university/content-assets/documents/fhm/dhr/chir/NSsynthesisguidanceVersion1-April2006.pdf)  
15  
16 [assets/documents/fhm/dhr/chir/NSsynthesisguidanceVersion1-April2006.pdf](https://www.lancaster.ac.uk/media/lancaster-university/content-assets/documents/fhm/dhr/chir/NSsynthesisguidanceVersion1-April2006.pdf) [Accessed  
17  
18 15 Apr 2021].  
19  
20
- 21 49. Rodgers M, Sowden A. Testing methodological guidance on the conduct of narrative  
22  
23 synthesis in systematic reviews: effectiveness of interventions to promote smoke alarm  
24  
25 ownership and function. *Evaluation* 2009;15:49–74.  
26  
27
- 28 50. Guyatt GH, Oxman AD, Akl EA, et al. GRADE guidelines: 1. Introduction – GRADE  
29  
30 evidence profiles and summary of findings tables. *J Clin Epidemiol* 2011;64:383–394.  
31  
32
- 33 51. Arksey H, O'Malley L. Scoping studies: towards a methodological framework. *Int J Soc*  
34  
35 *Res Methodol* 2005;8:19–32.  
36  
37
- 38 52. McKenna J, Jeske D. Ethical leadership and decision authority effects on nurses'  
39  
40 engagement, exhaustion, and turnover intention. *J Adv Nurs* 2021;77:198–206.  
41  
42  
43
- 44 53. International Council of Nurses. The Global Nursing shortage and Nurse Retention:  
45  
46 Policy Brief, 2021. Available: [https://www.icn.ch/sites/default/files/inline-](https://www.icn.ch/sites/default/files/inline-files/ICN%20Policy%20Brief_Nurse%20Shortage%20and%20Retention.pdf)  
47  
48 [files/ICN%20Policy%20Brief\\_Nurse%20Shortage%20and%20Retention.pdf](https://www.icn.ch/sites/default/files/inline-files/ICN%20Policy%20Brief_Nurse%20Shortage%20and%20Retention.pdf) [Accessed  
49  
50 15 Apr 2021].  
51  
52  
53  
54  
55  
56  
57  
58  
59  
60

- 1  
2  
3 54. Cochrane Library. About Cochrane Reviews, 2021. Available:  
4  
5 <https://www.cochranelibrary.com/about/about-cochrane-reviews> [Accessed 15 Aug  
6  
7 2021].  
8  
9  
10 55. Campbell M, Katikireddi SV, Sowden A et al. Lack of transparency in reporting narrative  
11  
12 synthesis of quantitative data: a methodological assessment of systematic reviews. *J Clin*  
13  
14 *Epidemiol* 2019;105:1–9.  
15  
16 56. Tawfik GM, Giang HTN, Ghozy S, et al. Protocol registration issues of systematic  
17  
18 review and meta-analysis studies: a survey of global researchers. *BMC Med Res*  
19  
20 *Methodol* 2020;20:213.  
21  
22  
23

#### 24 **Authors' contributions**

25  
26  
27 MV: conception (generator of the review) and responsible for the study design, identifying  
28  
29 preliminary literature for the background, writing the manuscript; TL: identifying preliminary  
30  
31 literature for the background, planning search strategy for papers, writing the manuscript; KH:  
32  
33 identifying preliminary literature for the background, planning search strategy for papers, writing  
34  
35 the manuscript; JV: search strategy for papers, commenting on the manuscript; GL: commenting  
36  
37 on the manuscript; YT: commenting on the manuscript; WC: commenting on the manuscript;  
38  
39 SH: commenting on the manuscript; XL: commenting on the manuscript.  
40  
41  
42  
43

#### 44 **Funding**

45  
46  
47 The work was supported by the Finnish National Agency of Education, Asia Program, grant  
48  
49 number 26/270/2020 and University of Turku (internal fund 26003424). The funders had no role  
50  
51 in the study design and will not have any role during its execution, analysis, interpretation of the  
52  
53 data, decision to publish, or preparation of the manuscript.  
54  
55  
56  
57  
58  
59  
60



1  
2  
3 **Competing interests**  
4  
5

6 The authors declare that they have no competing interests.  
7

8  
9 **Acknowledgements**  
10

11 We would like to thank to Central South University, Xiangya School of Nursing and the  
12 University of Turku, Department of Nursing Science about their support of the protocol  
13 preparation.  
14  
15  
16  
17  
18  
19  
20  
21  
22  
23  
24  
25  
26  
27  
28  
29  
30  
31  
32  
33  
34  
35  
36  
37  
38  
39  
40  
41  
42  
43  
44  
45  
46  
47  
48  
49  
50  
51  
52  
53  
54  
55  
56  
57  
58  
59  
60

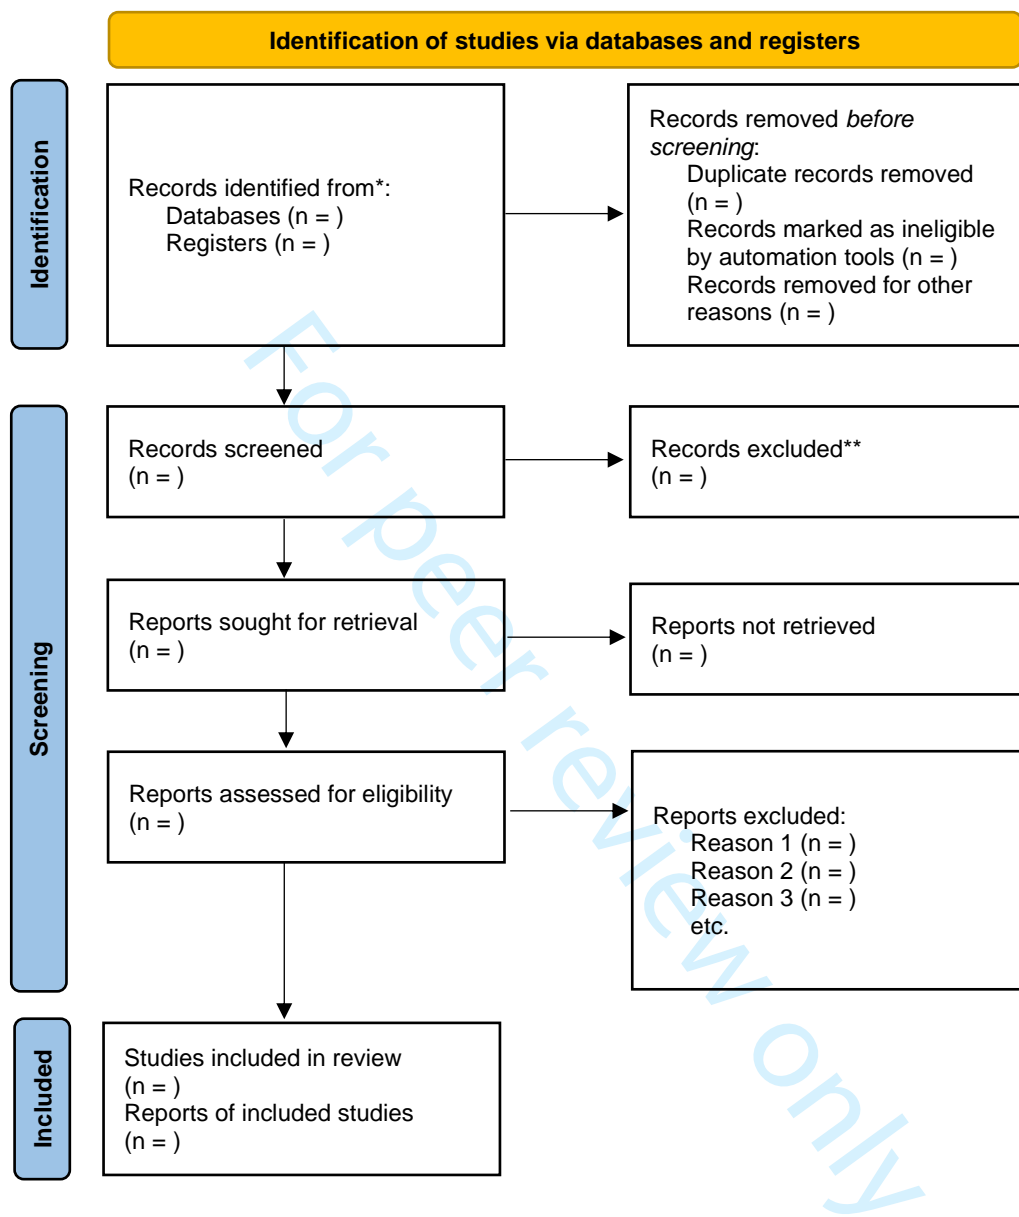

**Figure 1.** PRISMA flow chart.[32]

Supplementary Table 1. The search terms across data bases

| Database          | Search terms                                                                                                                                                                                                                                                                                                                                                                                                                                                                                                                                                                                                                                                                                                                                                                                                                                                                                                                                                                                                                                                                                      |
|-------------------|---------------------------------------------------------------------------------------------------------------------------------------------------------------------------------------------------------------------------------------------------------------------------------------------------------------------------------------------------------------------------------------------------------------------------------------------------------------------------------------------------------------------------------------------------------------------------------------------------------------------------------------------------------------------------------------------------------------------------------------------------------------------------------------------------------------------------------------------------------------------------------------------------------------------------------------------------------------------------------------------------------------------------------------------------------------------------------------------------|
| CINAHL (EBSCO)    | ("nursing leadership*" OR "leadership in nursing*" OR "nurse leader*" OR "nurse manag*" OR "nursing manag*" OR "nursing supervisor*" OR "nurse supervisor*" OR MH "Nursing Management" OR "director of nursing*" OR "nursing director*" OR "nurse director*" OR "nurse administrator*" OR MH "Nurse Administrators" OR "nursing administrator*" OR "nurse executive*" OR "executive nurse*" OR "primary nurse*" OR "chief nurse*" OR "chief nursing officer*" OR "head nurse*" OR matron* OR "charge nurse*" OR "sister nurse*" OR "ward sister*" OR "nurse executive*" OR "nursing executive*" OR "unit manag*") AND ("evidence based leadership*" OR EBL OR "evidence based management*" OR EBM OR "evidence based practice*" OR MH "Professional Practice, Evidence-Based" OR EBP OR "evidence based nursing*" OR MH "Nursing Practice, Evidence-Based" OR EBN OR "evidence based health*" OR "evidence-informed" OR "evidence informed*") AND (leadership* OR lead* OR MH "Leadership" OR manag* OR organiz* OR MH "Management" OR influenc* OR "peer influence*" OR administrat* OR superv*) |
| Cochrane Library  | (nursing NEXT leadership* OR leadership NEXT in NEXT nursing* OR nurse NEXT leader* OR nurse NEXT manag* OR nursing NEXT manag* OR nursing NEXT supervisor* OR nurse NEXT supervisor* OR director NEXT of NEXT nursing* OR nursing NEXT director* OR nurse NEXT director* OR nurse NEXT administrator* OR nursing NEXT administrator* OR nurse NEXT executive* OR executive NEXT nurse* OR primary NEXT nurse* OR chief NEXT nurse* OR chief NEXT nursing officer* OR head NEXT nurse* OR matron* OR charge NEXT nurse* OR sister NEXT nurse* OR ward NEXT sister* OR nurse NEXT executive* OR nursing NEXT executive* OR unit NEXT manag*) AND (evidence NEXT based NEXT leadership* OR EBL OR evidence NEXT based NEXT management* OR EB OR evidence NEXT based NEXT practice* OR EBP OR evidence NEXT based NEXT nursing* OR EBN OR evidence NEXT based NEXT health* OR "evidence-informed" OR "evidence NEXT informed*") AND (leadership* OR lead* OR manag* OR organiz* OR influenc* OR administrat* OR superv*)                                                                             |
| Embase (Elsevier) | ("nursing leadership*" OR "leadership in nursing*" OR "nurse leader*" OR "nurse manag*" OR "nursing manag*" OR "nursing supervisor*" OR "nurse supervisor*" OR 'nursing management'/exp OR "director of nursing*" OR "nursing director*" OR "nurse director*" OR "nurse administrator*" OR 'nurse administrator'/exp OR "nursing administrator*" OR "nurse executive*" OR "executive nurse*" OR "primary nurse*" OR "chief nurse*" OR "chief nursing officer*" OR "head nurse*" OR matron* OR "charge nurse*" OR "sister nurse*" OR "ward sister*" OR "nurse executive*" OR "nursing executive*" OR "unit manag*") AND ("evidence based leadership*" OR EBL OR "evidence based management*" OR EBM OR "evidence based practice*" OR 'evidence based practice'/exp OR EBP OR "evidence based nursing*" OR 'evidence based nursing'/exp OR EBN OR "evidence based health*" OR "evidence-informed" OR "evidence informed*") AND (leadership* OR lead* OR 'leadership'/exp OR manag* OR organiz* OR 'management'/exp OR influenc* OR "peer influence*" OR administrat* OR superv*)                    |

|                      |                                                                                                                                                                                                                                                                                                                                                                                                                                                                                                                                                                                                                                                                                                                                                                                                                                                                                                                                                                                                                                                                                                                                                                                                                                                                     |
|----------------------|---------------------------------------------------------------------------------------------------------------------------------------------------------------------------------------------------------------------------------------------------------------------------------------------------------------------------------------------------------------------------------------------------------------------------------------------------------------------------------------------------------------------------------------------------------------------------------------------------------------------------------------------------------------------------------------------------------------------------------------------------------------------------------------------------------------------------------------------------------------------------------------------------------------------------------------------------------------------------------------------------------------------------------------------------------------------------------------------------------------------------------------------------------------------------------------------------------------------------------------------------------------------|
| PsycINFO<br>(EBSCO)  | ("nursing leadership*" OR "leadership in nursing*" OR "nurse leader*" OR "nurse manag*" OR "nursing manag*" OR "nursing supervisor*" OR "nurse supervisor*" OR "director of nursing*" OR "nursing director*" OR "nurse director*" OR "nurse administrator*" OR "nursing administrator*" OR "nurse executive*" OR "executive nurse*" OR "primary nurse*" OR "chief nurse*" OR "chief nursing officer*" OR "head nurse*" OR matron* OR "charge nurse*" OR "sister nurse*" OR "ward sister*" OR "nurse executive*" OR "nursing executive*" OR "unit manag*") AND ("evidence based leadership*" OR EBL OR "evidence based management*" OR EBM OR "evidence based practice*" OR DE "evidence based practice" OR EBP OR "evidence based nursing*" OR EBN OR "evidence based health*" OR "evidence-informed" OR "evidence informed*") AND (leadership* OR lead* OR DE "Leadership" OR manag* OR organiz* OR DE "Management" OR influenc* OR "peer influence*" OR administrat* OR superv*)                                                                                                                                                                                                                                                                                  |
| PubMed<br>(MEDLINE)  | ("nursing leadership*[tw] OR "leadership in nursing*[tw] OR "nurse leader*[tw] OR "nurse manag*[tw] OR "nursing manag*[tw] OR "nursing supervisor*[tw] OR "nurse supervisor*[tw] OR "Nursing, Supervisory"[Mesh] OR "director of nursing*[tw] OR "nursing director*[tw] OR "nurse director*[tw] OR "nurse administrator*[tw] OR "Nurse Administrators"[Mesh] OR "nursing administrator*[tw] OR "nurse executive*[tw] OR "executive nurse*[tw] OR "primary nurse*[tw] OR "chief nurse*[tw] OR "chief nursing officer*[tw] OR "head nurse*[tw] OR matron*[tw] OR "charge nurse*[tw] OR "sister nurse*[tw] OR "ward sister*[tw] OR "nurse executive*[tw] OR "nursing executive*[tw] OR "unit manag*[tw]) AND ("evidence based leadership*[tw] OR EBL[tw] OR "evidence based management*[tw] OR EBM[tw] OR "evidence based practice*[tw] OR "Evidence-Based Practice"[Mesh] OR EBP[tw] OR "evidence based nursing*[tw] OR "Evidence-Based nursing"[Mesh] OR EBN[tw] OR "evidence based health*[tw] OR evidence-informed[tw] OR "evidence informed*[tw]) AND (leadership*[tw] OR lead*[tw] OR "Leadership"[Mesh] OR manag*[tw] OR organiz*[tw] OR "Organization and Administration"[Mesh] OR influenc*[tw] OR "Peer Influence"[Mesh] OR administrat*[tw] OR superv*[tw]) |
| Scopus<br>(Elsevier) | ("nursing leadership*" OR "leadership in nursing*" OR "nurse leader*" OR "nurse manag*" OR "nursing manag*" OR "nursing supervisor*" OR "nurse supervisor*" OR "director of nursing*" OR "nursing director*" OR "nurse director*" OR "nurse administrator*" OR "nursing administrator*" OR "nurse executive*" OR "executive nurse*" OR "primary nurse*" OR "chief nurse*" OR "chief nursing officer*" OR "head nurse*" OR matron* OR "charge nurse*" OR "sister nurse*" OR "ward sister*" OR "nurse executive*" OR "nursing executive*" OR "unit manag*") AND ("evidence based leadership*" OR EBL OR "evidence based management*" OR EBM OR "evidence based practice*" OR EBP OR "evidence based nursing*" OR EBN OR "evidence based health*" OR "evidence-informed" OR "evidence informed*") AND (leadership* OR lead* OR manag* OR organiz* OR influenc* OR "peer influence*" OR administrat* OR superv*)                                                                                                                                                                                                                                                                                                                                                        |
| Web of<br>Science    | (TS=(("nursing leadership*" OR "leadership in nursing*" OR "nurse leader*" OR "nurse manag*" OR "nursing manag*" OR "nursing supervisor*" OR "nurse supervisor*" OR "director of nursing*" OR "nursing director*" OR                                                                                                                                                                                                                                                                                                                                                                                                                                                                                                                                                                                                                                                                                                                                                                                                                                                                                                                                                                                                                                                |

1  
2  
3  
4  
5  
6  
7  
8  
9  
10  
11  
12  
13  
14  
15  
16  
17  
18  
19  
20  
21  
22  
23  
24  
25  
26  
27  
28  
29  
30  
31  
32  
33  
34  
35  
36  
37  
38  
39  
40  
41  
42  
43  
44  
45  
46  
47  
48  
49  
50  
51  
52  
53  
54  
55  
56  
57  
58  
59  
60

|                                                                                                                                                                                                                                                                                                                                                                                                                                                                                                                                                                                                                                                                                                 |
|-------------------------------------------------------------------------------------------------------------------------------------------------------------------------------------------------------------------------------------------------------------------------------------------------------------------------------------------------------------------------------------------------------------------------------------------------------------------------------------------------------------------------------------------------------------------------------------------------------------------------------------------------------------------------------------------------|
| "nurse director*" OR "nurse administrator*" OR "nursing administrator*" OR "nurse executive*" OR "executive nurse*" OR "primary nurse*" OR "chief nurse*" OR "chief nursing officer*" OR "head nurse*" OR "matron*" OR "charge nurse*" OR "sister nurse*" OR "ward sister*" OR "nurse executive*" OR "nursing executive*" OR "unit manag*") AND ("evidence based leadership*" OR EBL OR "evidence based management*" OR EBM OR "evidence based practice*" OR EBP OR "evidence based nursing*" OR EBN OR "evidence based health*" OR "evidence-informed" OR "evidence informed*") AND (leadership* OR lead* OR manag* OR organiz* OR influenc* OR "peer influence*" OR administrat* OR superv*)) |
|-------------------------------------------------------------------------------------------------------------------------------------------------------------------------------------------------------------------------------------------------------------------------------------------------------------------------------------------------------------------------------------------------------------------------------------------------------------------------------------------------------------------------------------------------------------------------------------------------------------------------------------------------------------------------------------------------|

For peer review only

**PRISMA-P (Preferred Reporting Items for Systematic review and Meta-Analysis Protocols) 2015 checklist: recommended items to address in a systematic review protocol\***

| Section and topic                 | Item No | Checklist item                                                                                                                                                                                                                | Page No         |
|-----------------------------------|---------|-------------------------------------------------------------------------------------------------------------------------------------------------------------------------------------------------------------------------------|-----------------|
| <b>ADMINISTRATIVE INFORMATION</b> |         |                                                                                                                                                                                                                               |                 |
| Title:                            |         |                                                                                                                                                                                                                               |                 |
| Identification                    | 1a      | Identify the report as a protocol of a systematic review                                                                                                                                                                      | 1               |
| Update                            | 1b      | If the protocol is for an update of a previous systematic review, identify as such                                                                                                                                            | n/a             |
| Registration                      | 2       | If registered, provide the name of the registry (such as PROSPERO) and registration number                                                                                                                                    | 2, 7            |
| Authors:                          |         |                                                                                                                                                                                                                               |                 |
| Contact                           | 3a      | Provide name, institutional affiliation, e-mail address of all protocol authors; provide physical mailing address of corresponding author                                                                                     | 1               |
| Contributions                     | 3b      | Describe contributions of protocol authors and identify the guarantor of the review                                                                                                                                           | 23              |
| Amendments                        | 4       | If the protocol represents an amendment of a previously completed or published protocol, identify as such and list changes; otherwise, state plan for documenting important protocol amendments                               | 16              |
| Support:                          |         |                                                                                                                                                                                                                               |                 |
| Sources                           | 5a      | Indicate sources of financial or other support for the review                                                                                                                                                                 | 23              |
| Sponsor                           | 5b      | Provide name for the review funder and/or sponsor                                                                                                                                                                             | 23              |
| Role of sponsor or funder         | 5c      | Describe roles of funder(s), sponsor(s), and/or institution(s), if any, in developing the protocol                                                                                                                            | 23              |
| <b>INTRODUCTION</b>               |         |                                                                                                                                                                                                                               |                 |
| Rationale                         | 6       | Describe the rationale for the review in the context of what is already known                                                                                                                                                 | 4-5             |
| Objectives                        | 7       | Provide an explicit statement of the question(s) the review will address with reference to participants, interventions, comparators, and outcomes (PICO)                                                                      | 7-8             |
| <b>METHODS</b>                    |         |                                                                                                                                                                                                                               |                 |
| Eligibility criteria              | 8       | Specify the study characteristics (such as PICO, study design, setting, time frame) and report characteristics (such as years considered, language, publication status) to be used as criteria for eligibility for the review | 9               |
| Information sources               | 9       | Describe all intended information sources (such as electronic databases, contact with study authors, trial registers or other grey literature sources) with planned dates of coverage                                         | 9               |
| Search strategy                   | 10      | Present draft of search strategy to be used for at least one electronic database, including planned limits, such that it could be repeated                                                                                    | 9, suppl. table |

|                                    |     |                                                                                                                                                                                                                                                     |       |
|------------------------------------|-----|-----------------------------------------------------------------------------------------------------------------------------------------------------------------------------------------------------------------------------------------------------|-------|
| Study records:                     |     |                                                                                                                                                                                                                                                     |       |
| Data management                    | 11a | Describe the mechanism(s) that will be used to manage records and data throughout the review                                                                                                                                                        | 10    |
| Selection process                  | 11b | State the process that will be used for selecting studies (such as two independent reviewers) through each phase of the review (that is, screening, eligibility and inclusion in meta-analysis)                                                     | 10    |
| Data collection process            | 11c | Describe planned method of extracting data from reports (such as piloting forms, done independently, in duplicate), any processes for obtaining and confirming data from investigators                                                              | 10-11 |
| Data items                         | 12  | List and define all variables for which data will be sought (such as PICO items, funding sources), any pre-planned data assumptions and simplifications                                                                                             | 10-11 |
| Outcomes and prioritization        | 13  | List and define all outcomes for which data will be sought, including prioritization of main and additional outcomes, with rationale                                                                                                                | 8, 11 |
| Risk of bias in individual studies | 14  | Describe anticipated methods for assessing risk of bias of individual studies, including whether this will be done at the outcome or study level, or both; state how this information will be used in data synthesis                                | 11    |
| Data synthesis                     | 15a | Describe criteria under which study data will be quantitatively synthesised                                                                                                                                                                         | n/a   |
|                                    | 15b | If data are appropriate for quantitative synthesis, describe planned summary measures, methods of handling data and methods of combining data from studies, including any planned exploration of consistency (such as I <sup>2</sup> , Kendall's τ) | n/a   |
|                                    | 15c | Describe any proposed additional analyses (such as sensitivity or subgroup analyses, meta-regression)                                                                                                                                               | n/a   |
|                                    | 15d | If quantitative synthesis is not appropriate, describe the type of summary planned                                                                                                                                                                  | 12    |
| Meta-bias(es)                      | 16  | Specify any planned assessment of meta-bias(es) (such as publication bias across studies, selective reporting within studies)                                                                                                                       | 15    |
| Confidence in cumulative evidence  | 17  | Describe how the strength of the body of evidence will be assessed (such as GRADE)                                                                                                                                                                  | 13    |

**\* It is strongly recommended that this checklist be read in conjunction with the PRISMA-P Explanation and Elaboration (cite when available) for important clarification on the items. Amendments to a review protocol should be tracked and dated. The copyright for PRISMA-P (including checklist) is held by the PRISMA-P Group and is distributed under a Creative Commons Attribution Licence 4.0.**

*From: Shamseer L, Moher D, Clarke M, Ghersi D, Liberati A, Petticrew M, Shekelle P, Stewart L, PRISMA-P Group. Preferred reporting items for systematic review and meta-analysis protocols (PRISMA-P) 2015: elaboration and explanation. BMJ. 2015 Jan 2;349(jan02 1):g7647.*
